## 23 **Abstract**

24 Background – While language impairment is the defining symptom of aphasia, the co-occurrence of  
25 non-language cognitive deficits and their importance in predicting rehabilitation and recovery  
26 outcomes is well documented. However, few studies have explored how individual cognitive domains  
27 contribute to patients' impairment and how this relates to underlying lesion pattern. A better  
28 understanding of this is essential for improving aphasia treatments.

29 Objectives – This study aimed to explore the brain-behaviour relationships between tests of  
30 individual cognitive skill, as well as language abilities, in patients with post-stroke aphasia. We  
31 predicted our analysis would reveal a latent (non-language specific) cognitive component, which  
32 would be driven by damage to left frontal cortices.

33 Methods – We analysed the behavioural and neural correlates of an extensive battery of language  
34 and non-language cognitive tests in a selective sample of 36 patients with post-stroke anomic  
35 aphasia, with relatively intact speech comprehension and repetition. The behavioural variables were  
36 analysed using Principle Component Analysis and their neural correlates were estimated using  
37 Voxel-Based Correlational Morphology.

38 Results – A significant number of anomia patients showed impaired performance on tests of non-  
39 language cognitive function. The variance underlying behavioural performance was best captured  
40 by four orthogonal components, two non-language cognitive components (executive function and  
41 verbal working memory) and two previously identified language components (phonology and  
42 semantics). Brain-behaviour relationships revealed separable neural correlates for each component  
43 in line with previous studies and a novel executive function correlate in the left inferior frontal cortex  
44 (LIFC).

45 Conclusion – Our findings suggest that in patients with chronic post-stroke anomia, non-language  
46 cognitive abilities explain more of the variance in language function than classical models of the  
47 condition imply. Additionally, lesions to the LIFC, including Broca's area, were associated with  
48 executive (dys)function, independent of language abilities, suggesting that lesions to this area might  
49 be primarily driving a (non-language specific) cognitive component in anomia.

## 50 **1. Introduction**

51 There is growing evidence that aphasia following a stroke can include deficits in non-language  
52 cognitive domains and that these are predictive of certain aspects of language function, recovery  
53 and rehabilitation. Despite compelling evidence for the influence of cognitive impairments on  
54 language abilities in post-stroke aphasia, patients rarely receive extensive cognitive assessment,  
55 meaning data on individual cognitive skills in these patients is scarce, and few studies have explored  
56 their relationship to underlying structural brain data.

57 Although language impairment is the defining consequence of post-stroke aphasia, the presence of  
58 co-occurring impairments in other cognitive domains has been well documented (Helm-Estabrooks,  
59 2002; Murray, 2012; El Hachoui et al., 2014; Marinelli et al., 2017; Ramsey et al., 2017;  
60 Schumacher et al., 2019). Marinelli and colleagues (2017) examined language and cognitive function  
61 in 189 People with Aphasia (PWA) and found more severe language deficits to be associated with  
62 more severe cognitive impairments. Other studies have investigated executive functions in PWA and  
63 consistently found impaired inhibition, working memory or cognitive flexibility (Frankel et al., 2007;  
64 Fridriksson et al., 2006; Jefferies, Patterson and Ralph, 2008; Lee and Pyun, 2014; Murray, 2012;  
65 Vallila-Rohter and Kiran, 2013). This pattern of observation is important for clinical management and  
66 rehabilitation. In fact, a series of aphasia therapy studies emphasise that cognitive abilities,  
67 particularly executive function and verbal short-term memory, play an important role in driving  
68 recovery outcomes (Fillingham, Sage and Lambon Ralph, 2005a, 2005b, 2006; Conroy, Sage and  
69 Lambon Ralph, 2009; Lambon Ralph et al., 2010; Yeung and Law, 2010; Snell, Sage and Lambon  
70 Ralph, 2010, Sage, Snell and Lambon Ralph, 2011; Dignam et al., 2017).

71 While studies have highlighted the impact of cognition on aphasia rehabilitation and recovery, few  
72 have explored the contribution of individual cognitive skills and the relationship to underlying lesion  
73 pattern; a better understanding of this is essential for improving aphasia recovery outcomes. The  
74 neural basis of aphasia is commonly explored by linking behavioural assessment with brain lesion  
75 data. This has resulted in some distinct brain-behaviour relationships for various language domains,  
76 however studies have found it difficult to identify significant associations between tests of executive

77 function and lesion data, either because non-language assessments were not included (Kummerer  
78 et al., 2013; Mirman et al., 2015) or were only included in a limited scope (Butler et al., 2014; Halai  
79 et al., 2017; Tochadse et al., 2018; though see Lacey et al., 2017).

80 Executive function and language are closely linked in both brain and behaviour. Behaviourally,  
81 cognitive control and working memory have long been known to support language processing  
82 (Gordon et al., 2002; Novais-Santos et al., 2007; January et al., 2009; Fedorenko, 2014). Neurally,  
83 both executive function and language robustly engage regions within the left frontal cortex (Kaan  
84 and Swaab, 2002; Novick et al., 2005). This makes it challenging to functionally dissociate  
85 anatomical correlates of the two domains. Of particular relevance is the function of Broca's area and  
86 the left inferior frontal gyrus (LIFG). Damage to Broca's area, which encompasses cytoarchitecturally  
87 defined Brodmann's area BA 44 and BA 45 of the left posterior inferior frontal gyrus (LpIFG) (Ardila  
88 et al., 2016; Papitto et al., 2020) commonly results in anomia, which has led people to believe that  
89 Broca's area and the LpIFG play a causal role in language. However, research in more recent years  
90 challenges this notion; the current view is that long-term speech production outcome in patients with  
91 LIFG damage is best explained by a combination of damage to LIFG and neighbouring regions  
92 including the underlying white matter, which was also damaged in Paul Broca's two historic cases  
93 (Dronkers et al., 2007; Gajardo-Vidal and Lorca-Puls et al., 2021), and that Broca's area is not  
94 specialised for speech and language, but rather is part of a wider network of general cognitive  
95 processing that includes, but is not limited to language (Duncan, 2010; Duncan, 2013). Nevertheless,  
96 some argue that executive functions and language occupy nearby but distinct regions within the left  
97 frontal cortex (Fedorenko and Varley, 2016). To date, the brain areas required for speech production,  
98 and the type of aphasia that results from damage to the LIFG remains a topic of continued debate  
99 (Marie, 1906; Mohr et al., 1978; Alexander et al., 1990; Lorch, 2008; Fridriksson et al., 2015;  
100 Tremblay and Dick, 2016).

101 When assessing cognitive abilities, it is important to consider that cognition is a multidimensional  
102 construct broadly comprising five general domains, including language, attention, memory, executive  
103 function and visuo-spatial skills (Helm-Estabrooks, 2002), with each domain containing distinct  
104 components. Using composite or general scores risks reducing the sensitivity of the cognitive

105 measure. Shumacher and colleagues (2019) recently demonstrated the importance of this by using  
106 a detailed non-verbal neuropsychological assessment to show that brain regions involved in  
107 particular components of the attention and executive function domains contribute to the abilities of  
108 patients with a wide range of aphasia types. Another study used extensive assessments of attention  
109 to show that different aspects of attention differentially predict language function in aphasia (Murray,  
110 2012). Finally, studies that have explored the role of cognition in aphasia have typically involved a  
111 sample of diverse aphasia types and severity. While this is pertinent to capturing the incidence of  
112 cognitive impairment in the general aphasic population, the wide variability of aphasia subtypes can  
113 confound analyses of the links between domain-general cognitive impairment and any particular  
114 aphasic subtype or symptom.

115 In this study, we investigated the behavioural and neural correlates of an extensive battery of  
116 language and domain-general cognitive functions in a selective population of patients with post-  
117 stroke anomia. Anomia is the most common symptom of post-stroke aphasia and manifests  
118 as difficulty in word retrieval when naming common objects (Laine and Martin, 2013). Crucially,  
119 patients with anomia have relatively preserved speech fluency, repetition, comprehension, and  
120 grammatical speech; as such anomia is seen as one of the 'purer' forms of language impairment  
121 (Goodglass et al., 2001). We collected a comprehensive behavioural battery containing language  
122 measures and an extensive assessment of individual cognitive domains, for 36 patients with anomia  
123 after stroke. The behavioural dataset was analysed using Principle Component Analysis (PCA).  
124 PCA is a useful exploratory tool that can extract the underlying latent structure of a set of correlated  
125 variables – like scores in standardised assessments of post-stroke cognitive impairment. Recently,  
126 there has been increasing interest in interpreting these latent variables in terms of the potentially  
127 separable cognitive sub-systems underlying (often strongly correlated) task scores. This is typically  
128 done by correlating latent variables with the original scores: those scores that correlate more strongly  
129 with the latent variable are said to load on that latent variable. Here, following recent results, we  
130 employ varimax rotation to encourage greater sparsity, and thus interpretability, in those loadings  
131 (Butler et al., 2014; Halai et al., 2017; Tochadse et al., 2018). The key aims of the study were: (i) to  
132 explore the underlying relationships between tests of individual cognitive skill, as well as patients'

133 language profiles; and (ii) to map the structural correlates for these underlying cognitive and  
134 language features. We predicted that our analysis would reveal a latent, (non-language specific)  
135 cognitive component to our patients' anomic symptoms, which would be driven by damage to left  
136 frontal cortices.

137

## 138 **2. Materials and methods**

139

### 140 **2.1 Participants**

141 Thirty-six English speakers with chronic aphasia following a single left-hemisphere stroke  
142 participated in the study (see fig. 1 for a lesion overlap map, table 1 for demographic and clinical  
143 data). All were at least 12 months post-stroke at the time of scanning and assessment, had normal  
144 hearing, normal or corrected-to-normal visual acuity and no previous history of neurological or  
145 psychiatric disease, as well as no contraindications to MRI scanning. Inclusion criteria were: (i)  
146 anomia as determined by the naming subtest of the Comprehensive Aphasia Test (Swinburn et al.,  
147 2005); (ii) good single word comprehension as assessed by the spoken words comprehension  
148 subtest of the Comprehensive Aphasia Test (Swinburn et al., 2005); (iii) relatively spared ability to  
149 repeat single monosyllabic words from the Psycholinguistic Assessments of Language Processing  
150 in Aphasia (Kay et al., 1992); (iv) absence of speech apraxia as determined by the Apraxia Battery  
151 for Adults (Dabul, 2000). Participants were excluded if they had any contraindications for scanning,  
152 had more than one stroke or had any other significant neurological or psychiatric  
153 conditions. Informed consent was obtained from all participants prior to participation under approval  
154 from Central London Research Ethics Committee, UK.

155

156

157

158

159

160 **Table 1.** Participant demographic and clinical data

| ID | Gender | Age (years) | Education (years) | Handedness pre-stroke | Handedness post-stroke | Time post-stroke (years) | Lesion Volume (voxels) |
|----|--------|-------------|-------------------|-----------------------|------------------------|--------------------------|------------------------|
| 01 | M      | 55          | 16                | L                     | R                      | 11                       | 7691                   |
| 02 | M      | 56          | 11                | R                     | L                      | 7                        | 20100                  |
| 03 | M      | 71          | 13                | R                     | R                      | 2                        | 5345                   |
| 04 | M      | 55          | 11                | R                     | R                      | 9                        | 7155                   |
| 05 | M      | 71          | 16                | R                     | R                      | 2                        | 9795                   |
| 06 | F      | 51          | 13                | R                     | L                      | 13                       | 5427                   |
| 07 | M      | 47          | 13                | R                     | L                      | 12                       | 20226                  |
| 08 | F      | 66          | 16                | R                     | L                      | 18                       | 10398                  |
| 09 | M      | 61          | 16                | L                     | R                      | 4                        | 7945                   |
| 10 | M      | 44          | 16                | R                     | L                      | 3                        | 4768                   |
| 11 | F      | 44          | 17                | R                     | R                      | 1                        | 3686                   |
| 12 | F      | 70          | 11                | R                     | L                      | 12                       | 1116                   |
| 13 | M      | 70          | 11                | R                     | L                      | 29                       | 14694                  |
| 14 | M      | 69          | 16                | R                     | L                      | 7                        | 21464                  |
| 15 | M      | 73          | 11                | R                     | R                      | 11                       | 8914                   |
| 16 | F      | 45          | 11                | L                     | L                      | 3                        | 7941                   |
| 17 | F      | 53          | 11                | R                     | R                      | 5                        | 2781                   |
| 18 | F      | 55          | 13                | L                     | L                      | 5                        | 189                    |
| 19 | M      | 40          | 17                | R                     | L                      | 8                        | 20469                  |
| 20 | M      | 64          | 13                | R                     | L                      | 24                       | 38523                  |
| 21 | M      | 42          | 17                | R                     | R                      | 1                        | 8225                   |
| 22 | M      | 74          | 16                | R                     | R                      | 11                       | 20566                  |
| 23 | M      | 63          | 16                | R                     | R                      | 25                       | 19614                  |
| 24 | M      | 64          | 16                | R                     | R                      | 10                       | 43529                  |
| 25 | M      | 60          | 16                | R                     | L                      | 11                       | 11790                  |
| 26 | F      | 60          | 11                | R                     | L                      | 6                        | 27911                  |
| 27 | M      | 75          | 11                | R                     | R                      | 12                       | 14069                  |
| 28 | F      | 50          | 16                | R                     | L                      | 3                        | 16325                  |
| 29 | M      | 64          | 11                | R                     | R                      | 8                        | 30049                  |
| 30 | M      | 29          | 13                | R                     | R                      | 6                        | 9826                   |
| 31 | F      | 81          | 10                | R                     | R                      | 16                       | 12423                  |
| 32 | M      | 60          | 13                | R                     | L                      | 20                       | 50389                  |
| 33 | M      | 65          | 13                | R                     | L                      | 14                       | 48396                  |
| 34 | M      | 82          | 13                | R                     | R                      | 34                       | 19076                  |
| 35 | M      | 58          | 16                | R                     | L                      | 8                        | 29911                  |
| 36 | M      | 39          | 17                | L                     | L                      | 2                        | 11963                  |

161 **2.2 Neuropsychology**

162 Behavioural assessment

163 A comprehensive battery of language and non-language tests was administered to assess  
164 participants' language and cognitive abilities (see supplementary material).

165 The language tests administered to assess speech production included the naming and repetition  
166 subtests of the CAT, the word/non-word repetition subtests from the Psycholinguistic Assessments  
167 of Language Processing in Aphasia subtests 8 and 9 (PALPA; Kay et al., 1992), the Boston Naming  
168 Test (BNT; Kaplan, Goodglass and Weintraub, 1983). The language assessments that captured  
169 other language functions included Pyramids and Palm Trees (PPT; Howard and Patterson, 1992),  
170 other subtests from the CAT, and the reading tasks from the PALPA8.

171 The non-language cognitive assessments included the Cattell Culture Fair IQ Test (Scale 2, Form A;  
172 Cattell and Cattell, 1963), Rey-Osterrieth Complex Figure Test (Osterrieth, 1944), Digit Span tasks  
173 from the Wechsler Adult Intelligence Scale – Fourth Edition (WAIS-IV; Wechsler, 2008), the trail  
174 making and card sorting subtests from the Delis-Kaplan Executive Function System test (D-KEFS;  
175 Delis, Kaplan and Kramer, 2001), the Hopkins Verbal Learning Test (HVLT; Brandt and Benedict,  
176 2001) and the Children’s Sustained Attention to Response Task (cSART; Robertson et al., 1997).

177

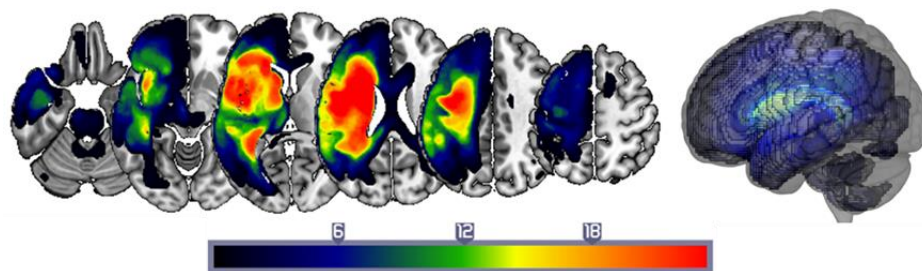

**Figure 1. Lesion overlap map.** A lesion overlap map for the 36 stroke anomic participants. Results are shown overlaid on the MNI template in MRIcro-GL (Rorden et al., 2007).

### 178 Principle Component Analysis

179 Participants’ scores on all assessments were entered into a PCA with varimax rotation (conducted  
180 with SPSS 26.0). We had 55 variables and 36 cases. Factors with an eigenvalue  $\geq 1.0$  were extracted  
181 then rotated. After orthogonal rotation, the factor loadings of each test allowed interpretation of what  
182 cognitive-language primary process was represented by that factor (table 2). Individual participants’  
183 scores on each extracted factor were then used as behavioural covariates in the neuroimaging  
184 analysis.



## 185 **2.3 Neuroimaging**

### 186 MR Imaging acquisition and analysis

187 Whole-brain imaging was performed on a 3T Siemens TIM-Trio system (Siemens, Erlangen,  
188 Germany) at the Wellcome Centre for Human Neuroimaging. Structural (T1-weighted) MRI images  
189 were normalised using Statistical Parametric Mapping software (SPM12) running under Matlab  
190 2015a (MathWorks, Natick, MA). Lesion images were defined by the Automatic Lesion Identification  
191 toolbox (ALI; Seghier et al., 2008), employing a variant of the unified segmentation algorithm  
192 (Ashburner and Friston, 2005), optimised for use in the focally damaged brain.

193 Structural MRI scans were pre-processed with Statistical Parametric Mapping software (SPM12:  
194 Wellcome Trust Centre for Neuroimaging, <http://www.fil.ion.ucl.ac.uk/spm/>). The images were  
195 normalised into standard Montreal Neurological Institute (MNI) space using a modified unified  
196 segmentation–normalisation procedure optimised for focal lesioned brains (Seghier et al., 2008).  
197 Data from all participants were entered into the segmentation–normalisation. This procedure  
198 combines segmentation, bias correction and spatial normalisation through the inversion of a single  
199 unified model (see Ashburner and Friston, 2005 for more details). In brief, the unified model  
200 combines tissue class (with an additional tissue class for abnormal voxels), intensity bias and non-  
201 linear warping into the same probabilistic models that are assumed to generate subject-specific  
202 images. Images were then smoothed with an 8 mm full-width-half-maximum (FWHM) Gaussian  
203 kernel and used in the lesion analyses described below. The lesion of each patient was automatically  
204 identified using an outlier detection algorithm, compared to healthy controls, based on fuzzy  
205 clustering. Voxel values in these regions range from 0 to 1, with higher values indicating greater  
206 evidence that the voxel is damaged, and evidence is derived by comparing tissue intensity in each  
207 voxel to intensities from a population of neurologically normal controls. The default parameters were  
208 used. The images generated for each patient were individually checked and visually inspected with  
209 respect to the original scan, and were used to create the lesion overlap map in fig. 1. We selected  
210 the Seghier et al. (2008) method as it is objective and efficient for a large sample of patients (Wilke,  
211 de Haan, Juenger and Karnath, 2011), in comparison to a labour-intensive hand-traced lesion mask.

212

## 213 Lesion-Symptom Mapping

214 For lesion-symptom mapping, we used the fuzzy lesion images as described above and correlated  
215 these with PCA factor scores using a voxel-based correlational methodology (VBCM: Tyler, Marslen-  
216 Wilson and Stamatakis, 2005), a variant of voxel-lesion symptom mapping (VLSM: Bates et al.,  
217 2003). We used VBCM because this approach i) has the virtue of preserving the continuous nature  
218 of both behavioural and neural indices i.e., does not require a binary classification of the  
219 intact/lesioned brain to be marked, as in the case of VLSM, and ii) replicates previous methodology  
220 using varimax-rotated PCA in aphasia (e.g. Butler et al., 2014), aiding data comparisons within the  
221 field.

222 The VBCM analysis of PCA factors was conducted in SPM12 running on Matlab 2019b. The analysis  
223 used the four continuous multidimensional predictors of the PCA factor scores, which are necessarily  
224 uncorrelated (orthogonal) with one another; these were entered simultaneously as continuous  
225 behavioural covariates. The outcome of the analysis therefore denotes which voxels' variation in  
226 tissue concentration corresponds to the unique variance in a given principle component, while  
227 controlling for variation in the other components in the analysis. In order to ensure that the results  
228 were not merely attributable to lesion size, each participants' lesion volume was calculated from the  
229 lesion identified by the automated lesion identification method (Seghier et al., 2008) and this was  
230 entered as a covariate in the VBCM. All analyses were performed with and without a correction for  
231 lesion volume. All anatomical labels were based on the Harvard–Oxford atlas in MNI space.

## 232 **3. Results**

### 233 **3.1 Neuropsychological profiles and principal language-cognitive factors**

234 The rotated PCA produced a four-factor solution which accounted for 55% of variance in participants'  
235 performance ( $F1 = 28.6\%$ ;  $F2 = 10.6\%$ ;  $F3 = 8.3\%$ ;  $F4 = 7.1\%$ ). The loadings of each of the different  
236 behavioural assessments on each of the factors are given in table 2 (for individual participants'  
237 scores on each factor, see supplementary table 1). Tasks which tapped into input and output  
238 phonology (e.g. word and non-word repetition) loaded heavily on Factor 1, as such we refer to this

239 factor as 'Phonology'. Factor 2 was interpreted as 'Executive Function', as assessments that loaded  
240 most heavily on it tapped into non-verbal cognitive processes (e.g. problem solving and concept  
241 formation). Assessments that loaded on Factor 3 were those requiring online maintenance and use  
242 of verbal inputs (e.g. digitspan, sentence repetition, spoken picture description), hence we refer to  
243 this factor as 'verbal working memory'. Finally, Factor 4 was interpreted as 'Semantics', the  
244 assessments that loaded on this factor were more diverse but primarily required processing of  
245 meaning (e.g. picture naming and comprehension of written sentences).

### 246 **3.2 The neural basis of performance in chronic stroke aphasia**

#### 247 Voxel-based morphometry of principle component analysis factors

248 The VBCM results are shown in fig. 2 and table 3. Each map displays where tissue concentration  
249 covaries uniquely with a given factor score, where the factors are necessarily uncorrelated with one  
250 another. Results are thresholded at  $P \leq 0.001$  voxel-level and  $P < 0.05$  FWE corrected cluster-level.

251 Performance on the phonological factor was uniquely correlated with a cluster of voxels in the left  
252 parietal lobe, with peak voxels in the left superior parietal lobe. The cluster also included voxels in  
253 the left inferior parietal lobule.

254 Performance on the executive function factor was uniquely related to a cluster of voxels in the left  
255 frontal lobe, with peak voxels in the left inferior frontal gyrus (pars orbitalis and pars triangularis) and  
256 the left dorsolateral prefrontal cortex.

257 Performance on the verbal working memory factor was uniquely related to a large cluster of voxels  
258 in the left hemisphere, with peak voxels in the posterior superior temporal gyrus, the superior  
259 longitudinal fasciculus and posterior thalamic radiation. The cluster also included voxels within left  
260 Wernicke's area, Heschl's gyrus and the hippocampus.

261 Performance on the semantic factor was uniquely related to two clusters in the left hemisphere with  
262 peak voxels in the superior/ middle temporal pole and superior/middle temporal gyrus. The clusters  
263 also included voxels across the left insula.

**Table 2. Loadings of behavioural assessments on rotated PCA factors**

|                                      | Factor 1<br>Phonology | Factor 2<br>Executive Function | Factor 3<br>Verbal Working Memory | Factor 4<br>Semantics |
|--------------------------------------|-----------------------|--------------------------------|-----------------------------------|-----------------------|
| PALPA9 Repetition - Words (LILF)     | <b>0.898</b>          | 0.089                          | 0.064                             | 0.190                 |
| PALPA9 Repetition - Words (LIHF)     | <b>0.859</b>          | -0.125                         | 0.196                             | 0.204                 |
| PALPA9 Repetition - Words (HILF)     | <b>0.829</b>          | 0.189                          | 0.054                             | 0.055                 |
| PALPA9 Repetition Non-Words          | <b>0.826</b>          | 0.045                          | 0.299                             | 0.135                 |
| PALPA8 Repetition Non-Words          | <b>0.792</b>          | -0.024                         | 0.308                             | 0.106                 |
| PALPA9 Repetition - Words (HIHF)     | <b>0.778</b>          | 0.108                          | 0.020                             | 0.099                 |
| CAT Repetition - Words               | <b>0.696</b>          | 0.075                          | 0.003                             | 0.404                 |
| CAT Repetition - Non-Words           | <b>0.620</b>          | 0.227                          | 0.180                             | 0.019                 |
| CAT Comprehension - Spoken Words     | <b>0.606</b>          | 0.269                          | -0.096                            | -0.099                |
| CAT Repetition - Complex Words       | <b>0.580</b>          | 0.042                          | 0.252                             | 0.265                 |
| DKEFS Card Sorting: Free Description | 0.036                 | <b>0.892</b>                   | 0.073                             | 0.212                 |
| DKEFS Card Sorting: Correct Sorts    | 0.119                 | <b>0.888</b>                   | 0.060                             | 0.179                 |
| DKEFS Card Sorting: Recognition      | 0.089                 | <b>0.841</b>                   | 0.207                             | 0.219                 |
| DKEFS Card Sorting: Perceptual Sorts | 0.073                 | <b>0.836</b>                   | 0.178                             | 0.225                 |
| DKEFS Card Sorting: Verbal Sorts     | 0.177                 | <b>0.599</b>                   | -0.052                            | 0.141                 |
| WAIS Forward Digit Span              | 0.286                 | 0.014                          | <b>0.870</b>                      | 0.098                 |
| WAIS Backward Digit Span             | 0.013                 | 0.014                          | <b>0.791</b>                      | 0.000                 |
| CAT Repetition - Digit String        | 0.121                 | 0.229                          | <b>0.776</b>                      | 0.173                 |
| CAT Repetition - Sentences           | 0.233                 | -0.004                         | <b>0.650</b>                      | <b>0.526</b>          |
| PALPA8 Reading - Non-Words           | 0.195                 | 0.228                          | <b>0.628</b>                      | 0.382                 |
| CAT Spoken Picture Description       | 0.276                 | 0.241                          | <b>0.537</b>                      | 0.330                 |
| CAT Reading - Non-Words              | 0.310                 | 0.378                          | <b>0.506</b>                      | 0.324                 |
| Boston Naming Test                   | 0.123                 | 0.440                          | -0.018                            | <b>0.771</b>          |
| CAT Reading - Words                  | 0.298                 | 0.243                          | 0.314                             | <b>0.748</b>          |
| CAT Naming - Objects                 | 0.400                 | 0.055                          | 0.099                             | <b>0.713</b>          |
| CAT Naming - Actions                 | 0.136                 | 0.281                          | 0.170                             | <b>0.646</b>          |
| CAT Reading - Complex Words          | 0.273                 | 0.049                          | 0.568                             | <b>0.640</b>          |
| CAT Reading - Function Words         | 0.088                 | 0.265                          | 0.268                             | <b>0.544</b>          |
| CAT Writing to Dictation             | 0.161                 | 0.290                          | 0.399                             | <b>0.529</b>          |
| CAT Comprehension -Written Sentences | 0.138                 | 0.139                          | 0.372                             | <b>0.510</b>          |

283 Factor loadings >0.5 are given in bold. PALPA = Psycholinguistic Assessments of Language Processing in Aphasia; LILF = Low Intelligibility Low Frequency, LIHF = Low  
284 Intelligibility High Frequency, HIHF = High Intelligibility High Frequency, HILF = High Intelligibility Low Frequency. CAT = Comprehensive Aphasia Test. DKEFS = Delis-  
285 Kaplan Executive Function System. WAIS = Wechsler Adult Intelligence Scale.

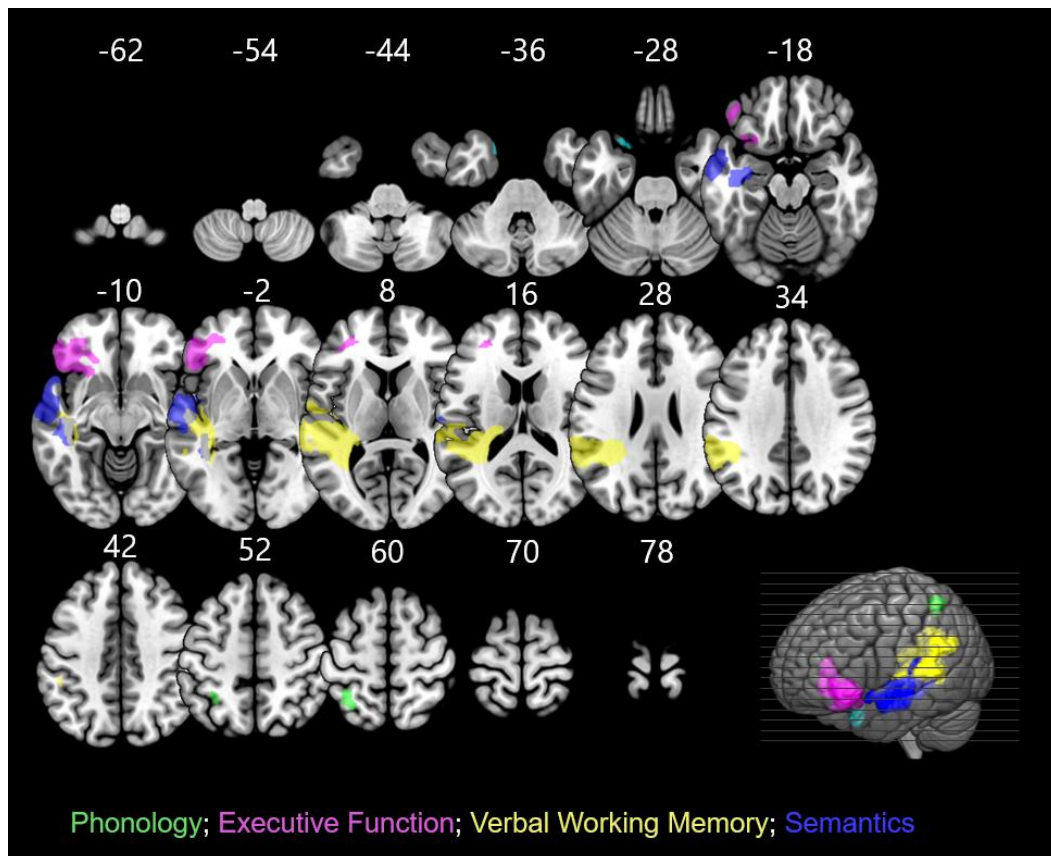

286

**Figure 2. Structural correlates associated with each component from the combined PCA.** Phonology: green; Executive Function: magenta; Verbal Working Memory: yellow; Semantics: two distinct clusters in cyan and indigo. Clusters were obtained by applying a voxel-level threshold at  $P < 0.05$  and a FWE correction at cluster-level  $P < 0.001$ . The lower right corner displays a rendered brain showing clusters projected to the brain surface.

### 287 Lesion size and age

288 Given that some brain regions are more likely than others to be damaged after middle cerebral artery  
289 (MCA) stroke (Phan et al., 2005) and some regions are more susceptible to age-related atrophy, we  
290 controlled for lesion volume and age in subsequent lesion-symptom analyses.

291 Each participant's lesion volume was calculated from the lesion identified by the modified  
292 segmentation-normalization procedure (see 'Materials and methods' section). For the PCA factors,  
293 lesion volume correlated relatively weakly with the phonology factor ( $r=0.137$ ,  $p=0.426$ ), the auditory  
294 working memory factor ( $r= -0.318$ ,  $p=0.059$ ) and semantic factor ( $r= -0.313$ ,  $p=0.063$ ), and slightly  
295 more strongly with the executive-function factor ( $r= -0.426$ ,  $p=0.10$ )

296 Including age in the VBCM model with the PCA factor scores did not alter the pattern of results  
297 obtained. However, including lesion volume in the model reduced the significance of the executive

298 function measure, but did not alter the pattern of results in the remaining 3 PCA factors. As previously  
 299 mentioned, the executive function component correlated with tissue damage in the left inferior frontal  
 300 cortex (LIFC); as a common region of damage in left MCA stroke (Phan et al., 2005), high covariance  
 301 between LIFC tissue integrity and total lesion volume is expected.

302 **Table 3. Neural correlates for omnibus PCA factors**

| Principle Component        | Location                                                   | Extent (voxels) | Z    | MNI co-ordinates |     |     |
|----------------------------|------------------------------------------------------------|-----------------|------|------------------|-----|-----|
|                            |                                                            |                 |      | x                | y   | z   |
| F1 (Phonology)             | Left Superior Parietal Lobe                                | 175             | 4.16 | -34              | -54 | 58  |
| F2 (Executive Function)    |                                                            | 1563            |      |                  |     |     |
|                            | Left Inferior Frontal Gyrus (Pars Triangularis)            |                 | 3.93 | -44              | 36  | 2   |
|                            | Left Inferior Frontal Gyrus (Pars Orbitalis)               |                 | 3.59 | -40              | 42  | -8  |
|                            | Left Middle Frontal Gyrus (Dorsolateral Prefrontal Cortex) |                 | 3.56 | -30              | 44  | 4   |
| F3 (Verbal Working Memory) |                                                            | 5262            |      |                  |     |     |
|                            | Left Posterior Superior Temporal Gyrus                     |                 | 4.49 | -58              | -28 | 6   |
|                            | Left Superior Longitudinal Fasciculus                      |                 | 4.94 | -38              | -44 | 18  |
|                            | Left Posterior Thalamic Radiation                          |                 | 5.35 | -36              | -46 | 2   |
| F4 (Semantics)             |                                                            | 209             |      |                  |     |     |
|                            | Left Superior Temporal Pole                                |                 | 4.82 | -22              | 10  | -24 |
|                            | Left Middle Temporal Pole                                  |                 | 4.47 | -20              | 12  | -34 |
|                            |                                                            | 2343            |      |                  |     |     |
|                            | Left Superior Temporal Gyrus                               |                 | 4.14 | -64              | -10 | -4  |
|                            | Left Middle Temporal Gyrus                                 |                 | 4.14 | -62              | -14 | -12 |

## 303 4. Discussion

304 The aim of the current study was to investigate the presence of latent cognitive factors that might  
 305 explain the variance in aphasic language abilities and how this relates to underlying lesion pattern.  
 306 We conducted an extensive language and non-language neuropsychological assessment in a  
 307 selective sample of 36 patients with anomia, with relatively intact speech comprehension  
 308 and repetition. Our study extended previous work on the importance of non-language cognitive  
 309 function in aphasia and found that (i) a significant number of anomia patients showed impaired  
 310 performance on tests of non-language cognitive function (see supplementary material); (ii) the  
 311 variance underlying language and non-language test performance was best captured by four

312 orthogonal components, two previously identified language components (phonology and semantics)  
313 and two non-language cognitive components (executive function and verbal working memory) (table  
314 2); (iii) brain-behaviour relationships revealed separable neural correlates for each component in line  
315 with previous studies and a novel executive function correlate in the left inferior frontal cortex (LIFC)  
316 (fig. 2, table 3).

317 The neural correlates associated with the two language components were in line with previous  
318 literature. The phonological component explained the largest proportion of behavioural variance.  
319 Scores on this component, which in our study loaded principally on tests of speech repetition,  
320 uniquely correlated with tissue damage in the left superior and inferior parietal lobule (fig. 2). This is  
321 in line with previous work showing impaired speech repetition is associated with left parietal lobe  
322 damage (Fridriksson et al., 2010). Previous studies that have used a similar approach of combined  
323 rotated PCA and VBCM in aphasia patients report a phonology component in left temporo-parietal  
324 regions (Butler et al., 2014; Halai et al., 2017; Shumacher et al., 2019). It is important to note that the  
325 phonology component in those studies loaded on tests of naming and verbal working memory, as  
326 well as repetition. This differentiation may be due to a more extensive neuropsychological  
327 assessment in our study resulting in more discrete PCA components, or a result of our selective  
328 patient sample. The semantic component explained the least amount of behavioural variance in our  
329 sample. Scores on this factor loaded on tests of naming, reading and written comprehension and  
330 uniquely correlated with regions in the left superior/ medial temporal pole and the left superior/ medial  
331 temporal gyrus (fig. 2). This supports recent work extending the temporal region implicated in  
332 semantic control (Jackson, 2021).

333 Importantly, higher cognitive functions, namely executive function and verbal working memory,  
334 explain a significant amount of variance in language abilities in our population of anomic aphasics.  
335 As mentioned previously, both executive function and verbal working memory are robust predictors  
336 of aphasia recovery outcomes (Fillingham, Sage and Lambon Ralph, 2005a, 2005b, 2006; Conroy,  
337 Sage and Lambon Ralph, 2009; Lambon Ralph et al., 2010; Yeung and Law, 2010; Snell, Sage and  
338 Lambon Ralph, 2010, Sage, Snell and Lambon Ralph, 2011; Dignam et al., 2017). During aphasia  
339 recovery, executive function is important for the generation of semantic and phonological concepts

340 to aid with word retrieval (Dignam et al, 2017) and to navigate other complex dynamics of human  
341 communication, while the integrity of general memory processes enables learning and retention of  
342 linguistic knowledge during rehabilitation. In our study, the verbal working memory component  
343 uniquely correlated with regions of tissue damage in the left posterior superior temporal gyrus, left  
344 superior longitudinal fasciculus, as well as Heschl's gyrus, Wernicke's area and the hippocampus  
345 (fig. 2). This component captured abilities in online maintenance and use of verbal inputs (e.g. digit-  
346 span, sentence repetition, spoken picture description). This replicates findings from Tochadse et al.,  
347 (2019) who report a similar neural correlate associated with a novel auditory working memory  
348 component in aphasia patients.

349 Scores on the executive function factor uniquely correlated with tissue damage in the left inferior  
350 frontal cortex (LIFC), including pars orbitalis and pars triangularis (fig. 2). These findings support the  
351 role of Broca's area, here pars triangularis in particular, in domain-general cognition and extend our  
352 understanding of the neural correlates of anomia. We show that in these patients, lesions to the  
353 LIFC, including Broca's area, are principally associated with executive (dys)function, independent of  
354 language abilities. This suggests that, while damage to the LIFC commonly coincides with language  
355 impairment after stroke, lesions to this area might be primarily driving a (non-language specific)  
356 cognitive component of anomia. We speculate that lesions to Broca's area result in cognitive deficits  
357 which can indirectly contribute to varying levels of long-term language impairment, and the nature of  
358 these impairments will vary depending on the pattern of damage to neighbouring regions of grey and  
359 white matter (Kimberg et al., 2007; Richardson et al., 2012; Inoue et al., 2014; Mah et al., 2014;  
360 Sperber and Karnath et al., 2017; Gajardo-Vidal and Lorca-Puls et al., 2021).

361 Behaviourally, the executive function component loaded on tests of problem solving and concept  
362 formation as measured by the D-KEFS Card Sorting assessment. Card sorting assessments,  
363 including the D-KEFS and Wisconsin (Berg, 1948) tasks, appear to reliably engage executive  
364 function and the left inferior frontal gyrus (LIFG) in aphasia patients. The neural correlates associated  
365 with our executive function component show some overlap with a PCA component identified by  
366 Schumacher and colleagues (2019), which the authors refer to as 'inhibit-generate'. The 'inhibit-  
367 generate' component captured abilities of idea generation, reasoning, problem solving and response



368 inhibition in aphasia patients and loaded on, amongst others, the D-KEFS card sorting test.  
369 Additionally, using the Wisconsin Card Sorting Task, Baldo et al. (2005) reported impairments in  
370 aphasic individuals, but not in patients with left-hemisphere damage but without aphasia, suggesting  
371 that the card sorting task taps into executive function abilities that are necessary for language  
372 function. Another study showed that the D-KEFS Card Sorting assessment is predicative of  
373 successful anomia therapy outcomes (Dignam et al., 2017). Collectively, these findings suggest that  
374 in aphasia patients, D-KEFS is a sensitive measure of executive function and associated neural  
375 correlates in the LIFG that support language function. Not including assessments of concept  
376 formation and problem solving, such as card sorting tasks, might be why previous studies in aphasia  
377 have struggled to find associations between tests of executive function and brain tissue integrity  
378 (Kummerer et al., 2013; Butler et al., 2014; Mirman et al., 2015; Halai et al., 2017; Tochadse et al.,  
379 2018).

380 In conclusion, our findings suggest that in patients with chronic post-stroke anomia, cognitive abilities  
381 and in particular executive function and verbal working memory, explain more of the variance in  
382 language function than classical models of the condition imply. Moreover, lesions to the LIFG,  
383 including Broca's area, determine whether patients suffer worse executive (dys)function,  
384 independent of their language abilities, suggesting that damage to Broca's area is primarily  
385 associated with outcomes in cognitive domains outside of language. This highlights the importance  
386 of higher-order cognitive domains and their neural correlates in aphasia (Helm-Estabrooks, 2002;  
387 Fucetola et al., 2009), but does not imply that all aphasics will have additional cognitive impairments.  
388 A better understanding of the covariance between language and non-language deficits and their  
389 underlying neural correlates will inform more targeted aphasia treatment, tailored to an individual's  
390 pattern of impairments. This may be in the form of neurostimulation targeting regions of domain-  
391 general cognition or by incorporating measures of higher-order cognitive function, such as concept  
392 formation and verbal working memory, to improve the accuracy of aphasia prediction models (Price  
393 et al., 2010; Hope et al., 2013, 2018; Yourganov et al., 2015).

## 394 **References**

- 395 Alexander, M. P., Naeser, M. A. and Palumbo, C. (1990) 'Brocas area aphasias - aphasia after lesions  
396 including the frontal operculum', *Neurology*, 40 (2), pp.353-362.
- 397 Ardila, A., Bernal, B. and Rosselli, M. (2016) 'How Localized are Language Brain Areas? A Review of  
398 Brodmann Areas Involvement in Oral Language', *Archives of Clinical Neuropsychology*, 31(1), pp.  
399 112-122.
- 400 Ashburner, J. and Friston, K. J. (2005) 'Unified segmentation', *Neuroimage*, 26(3), pp. 839-851.
- 401 Baldo, J., Dronkers, N., Wilkins, D., Ludy, C., Raskin, P. and Kim, J. (2005) 'Is problem solving  
402 dependent on language?', *Brain and Language*, 92(3), pp. 240-250.
- 403 Bates, E., Wilson, S. M., Saygin, A. P., Dick, F., Sereno, M. I., Knight, R. T. and Dronkers, N. F. (2003)  
404 'Voxel-based lesion-symptom mapping', *Nature Neuroscience*, 6(5), pp. 448-450.
- 405 Berg, E. A. (1948) 'A Simple Objective Technique for Measuring Flexibility in Thinking', *The Journal of*  
406 *General Psychology*, 39(1), pp. 15-22.
- 407 Brandt J, Benedict R. Verbal Learning Test-Revised Professional Manual. Lutz, FL: Psychological  
408 Assessment Resources, Inc (2001).
- 409 Butler, R. A., Lambon Ralph, M. A. and Woollams, A. M. (2014) 'Capturing multidimensionality in stroke  
410 aphasia: mapping principal behavioural components to neural structures', *Brain*, 137(12), pp. 3248-  
411 3266.
- 412 Cattell, R. B. and Cattell, A. K. S. (1963). Culture fair intelligence test. Champaign, IL: Institute for  
413 Personality and Ability Testing
- 414 Conroy, P., Sage, K. and Lambon Ralph, M. A. (2009) 'The effects of decreasing and increasing cue  
415 therapy on improving naming speed and accuracy for verbs and nouns in aphasia', *Aphasiology*,  
416 23(6), pp. 707-730.
- 417 Dabul, B. (2000). Apraxia battery for adults (second ed.). Austin, Tx: Pro-Ed.
- 418 Delis, D. C., Kaplan, E., and Kramer, J. H. (2001). D-KEFS Executive Function System: Examiners  
419 manual. *San Antonio, TX: Psychological Corporation*.
- 420 Dignam, J., Copland, D., O'Brien, K., Burfein, P., Khan, A. and Rodriguez, A. D. (2017) 'Influence of  
421 Cognitive Ability on Therapy Outcomes for Anomia in Adults With Chronic Poststroke Aphasia',  
422 *Journal of Speech, Language, and Hearing Research*, 60(2), pp. 406-421.
- 423 Dronkers, N. F., Plaisant, O., Iba-Zizen, M. T. and Cabanis, E. A. (2007) 'Paul Broca's historic cases:  
424 high resolution MR imaging of the brains of Leborgne and Lelong', *Brain*, 130(5), pp. 1432-1441.
- 425 Duncan, J. (2010) 'The multiple-demand (MD) system of the primate brain: mental programs for  
426 intelligent behaviour', *Trends in Cognitive Sciences*, 14(4), pp. 172-179.
- 427 Duncan, J. (2013) 'The Structure of Cognition: Attentional Episodes in Mind and Brain', *Neuron*, 80(1),  
428 pp. 35-50.
- 429 El Hachoui, H., Visch-Brink, E. G., Lingsma, H. F., Van De Sandt-Koenderman, M. W. M. E., Dippel,

- 430 D. W. J., Koudstaal, P. J. and Middelkoop, H. A. M. (2014) 'Nonlinguistic Cognitive Impairment in  
431 Poststroke Aphasia', *Neurorehabilitation and Neural Repair*, 28(3), pp. 273-281.
- 432 Fedorenko, E. (2014) 'The role of domain-general cognitive control in language comprehension',  
433 *Frontiers in Psychology*, 5.
- 434 Fedorenko, E. and Varley, R. (2016) 'Language and thought are not the same thing: evidence from  
435 neuroimaging and neurological patients', *Annals of the New York Academy of Sciences*, 1369(1),  
436 pp. 132-153.
- 437 Fillingham, J., Sage, K. and Lambon Ralph, M. (2005a) 'Further explorations and an overview of  
438 errorless and errorful therapy for aphasic word-finding difficulties: The number of naming attempts  
439 during therapy affects outcome', *Aphasiology*, 19(7), pp. 597-614.
- 440 Fillingham, J. K., Sage, K. and Lambon Ralph, M. A. (2005b) 'Treatment of anomia using errorless  
441 versus errorful learning: are frontal executive skills and feedback important?', *International Journal*  
442 *of Language & Communication Disorders*, 40(4), pp. 505-523.
- 443 Fillingham, J. K., Sage, K. and Lambon Ralph †, M. A. (2006) 'The treatment of anomia using errorless  
444 learning', *Neuropsychological Rehabilitation*, 16(2), pp. 129-154.
- 445 Frankel, T., Penn, C. and Ormond-Brown, D. (2007) 'Executive dysfunction as an explanatory basis for  
446 conversation symptoms of aphasia: A pilot study', *Aphasiology*, 21(6-8), pp. 814-828.
- 447 Fridriksson, J., Fillmore, P., Guo, D. and Rorden, C. (2015) 'Chronic Broca's Aphasia Is Caused by  
448 Damage to Broca's and Wernicke's Areas', *Cerebral Cortex*, 25(12), pp. 4689-4696.
- 449 Fridriksson, J., Kjartansson, O., Morgan, P. S., Hjaltason, H., Magnúsdóttir, S., Bonilha, L. and Rorden,  
450 C. (2010) 'Impaired Speech Repetition and Left Parietal Lobe Damage', *Journal of Neuroscience*,  
451 30(33), pp. 11057-11061.
- 452 Fridriksson, J., Nettles, C., Davis, M., Morrow, L. and Montgomery, A. (2006) 'Functional communication  
453 and executive function in aphasia', *Clinical Linguistics & Phonetics*, 20(6), pp. 401-410.
- 454 Fucetola, R., Connor, L. T., Strube, M. J. and Corbetta, M. (2009) 'Unravelling nonverbal cognitive  
455 performance in acquired aphasia', *Aphasiology*, 23(12), pp. 1418-1426.
- 456 Gajardo-Vidal, A., Lorca-Puls, D. L., Team, P., Warner, H., Pshdary, B., Crinion, J. T., Leff, A. P., Hope,  
457 T. M. H., Geva, S., Seghier, M. L., Green, D. W., Bowman, H. and Price, C. J. (2021) 'Damage to  
458 Broca's area does not contribute to long-term speech production outcome after stroke', *Brain*.
- 459 Goodglass, H., Kaplan, E., and Barresi, B. (2001) The assessment of aphasia and related disorders  
460 (3rd ed.). *Philadelphia: Lippincott, Williams, & Wilkins*.
- 461 Gordon, P. C., Hendrick, R. and Levine, W. H. (2002) 'Memory-Load Interference in Syntactic  
462 Processing', *Psychological Science*, 13(5), pp. 425-430.
- 463 Halai, A. D., Woollams, A. M. and Lambon Ralph, M. A. (2017) 'Using principal component analysis to  
464 capture individual differences within a unified neuropsychological model of chronic post-stroke  
465 aphasia: Revealing the unique neural correlates of speech fluency, phonology and semantics',  
466 *Cortex*, 86, pp. 275-289.
- 467 Helm-Estabrooks, N. (2002) 'Cognition and aphasia: a discussion and a study', *Journal of*

- 468 *Communication Disorders*, 35(2), pp. 171-186.
- 469 Hope, T. M. H., Leff, A. P. and Price, C. J. (2018) 'Predicting language outcomes after stroke: Is  
470 structural disconnection a useful predictor?', *NeuroImage: Clinical*, 19, pp. 22-29.
- 471 Hope, T. M. H., Seghier, M. L., Leff, A. P. and Price, C. J. (2013) 'Predicting outcome and recovery after  
472 stroke with lesions extracted from MRI images', *NeuroImage: Clinical*, 2, pp. 424-433.
- 473 Howard, D., and Patterson, K. (1992) *Pyramids and Palm Trees: A test of semantic access from pictures  
474 and words. Bury St. Edmunds, UK: Thames Valley Test Company.*
- 475 Inoue, K., Madhyastha, T., Rudrauf, D., Mehta, S. and Grabowski, T. (2014) 'What affects detectability  
476 of lesion–deficit relationships in lesion studies?', *NeuroImage: Clinical*, 6, pp. 388-397.
- 477 Jackson, R. L. (2021) 'The neural correlates of semantic control revisited', *NeuroImage*, 224, pp.  
478 117444.
- 479 January, D., Trueswell, J. C. and Thompson-Schill, S. L. (2009) 'Co-localization of Stroop and Syntactic  
480 Ambiguity Resolution in Broca's Area: Implications for the Neural Basis of Sentence Processing',  
481 *Journal of Cognitive Neuroscience*, 21(12), pp. 2434-2444.
- 482 Jefferies, E., Patterson, K. and Ralph, M. A. L. (2008) 'Deficits of knowledge versus executive control  
483 in semantic cognition: Insights from cued naming', *Neuropsychologia*, 46(2), pp. 649-658.
- 484 Kaan, E. and Swaab, T. Y. (2002) 'The brain circuitry of syntactic comprehension', *Trends in Cognitive  
485 Sciences*, 6(8), pp. 350-356.
- 486 Kaplan, E., Goodglass, H., Weintraub, S (1983) *Boston Naming Test. Philadelphia: Lea & Febiger.*
- 487 Kay, J., Lesser, R., & Coltheart, M. (1992) *Psycholinguistic Assessments of Language Processing in  
488 Aphasia (PALPA). Hove: Erlbaum.*
- 489 Kimberg, D. Y., Coslett, H. B. and Schwartz, M. F. (2007) 'Power in Voxel-based Lesion-Symptom  
490 Mapping', *Journal of Cognitive Neuroscience*, 19(7), pp. 1067-1080.
- 491 Kümmerer, D., Hartwigsen, G., Kellmeyer, P., Glauche, V., Mader, I., Klöppel, S., Suchan, J., Karnath,  
492 H.-O., Weiller, C. and Saur, D. (2013) 'Damage to ventral and dorsal language pathways in acute  
493 aphasia', *Brain*, 136(2), pp. 619-629.
- 494 Lacey, E. H., Skipper-Kallal, L. M., Xing, S., Fama, M. E. and Turkeltaub, P. E. (2017) 'Mapping  
495 Common Aphasia Assessments to Underlying Cognitive Processes and Their Neural Substrates',  
496 *Neurorehabilitation and Neural Repair*, 31(5), pp. 442-450.
- 497 Laine, M. and Martin, N. (2013) *Anomia: Theoretical and clinical aspects. Psychology Press.*
- 498 Lambon Ralph, M. A., Snell, C., Fillingham, J. K., Conroy, P. and Sage, K. (2010) 'Predicting the  
499 outcome of anomia therapy for people with aphasia post CVA: Both language and cognitive status  
500 are key predictors', *Neuropsychological Rehabilitation*, 20(2), pp. 289-305.
- 501 Lee, B. and Pyun, S.-B. (2014) 'Characteristics of Cognitive Impairment in Patients With Post-stroke  
502 Aphasia', *Annals of Rehabilitation Medicine*, 38(6), pp. 759.
- 503 Lorch, M. P. (2008) 'The merest Logomachy: The 1868 Norwich discussion of aphasia by Hughlings  
504 Jackson and Broca', *Brain*, 131, pp. 1658-1670.
- 505 Mah, Y.-H., Husain, M., Rees, G. and Nachev, P. (2014) 'Human brain lesion-deficit inference

- 506 remapped', *Brain*, 137(9), pp. 2522-2531.
- 507 Marie P. (1906) Aphasia from 1861 to 1866. Essay of historical criticism on the genesis of the doctrine  
508 of aphasia. *Sem Méd.* 26:565–571.
- 509 Marinelli, C. V., Spaccavento, S., Craca, A., Marangolo, P. and Angelelli, P. (2017) 'Different Cognitive  
510 Profiles of Patients with Severe Aphasia', *Behavioural Neurology*, 2017, pp. 15.
- 511 Mirman, D., Chen, Q., Zhang, Y., Wang, Z., Faseyitan, O. K., Coslett, H. B. and Schwartz, M. F. (2015)  
512 'Neural organization of spoken language revealed by lesion–symptom mapping', *Nature*  
513 *Communications*, 6(1), pp. 6762.
- 514 Mohr, J. P., Pessin, M. S., Finkelstein, S., Funkenstein, H. H., Duncan, G. W. and Davis, K. R. (1978)  
515 'BROCA APHASIA - PATHOLOGIC AND CLINICAL', *Neurology*, 28(4), pp. 311-324.
- 516 Murray, L. L. (2012) 'Attention and Other Cognitive Deficits in Aphasia: Presence and Relation to  
517 Language and Communication Measures', *American Journal of Speech-Language Pathology*, 21(2),  
518 pp. S51-S64.
- 519 Nicholas, L. E., Brookshire, R. H., MacLennan, D. L., Schumacher, J. G. and Porrazzo, S. A. (1989)  
520 'Revised administration and scoring procedures for the Boston Naming test and norms for non-brain-  
521 damaged adults', *Aphasiology*, 3(6), pp. 569-580.
- 522 Novais-Santos, S., Gee, J., Shah, M., Troiani, V., Work, M. and Grossman, M. (2007) 'Resolving  
523 sentence ambiguity with planning and working memory resources: Evidence from fMRI',  
524 *NeuroImage*, 37(1), pp. 361-378.
- 525 Novick, J. M., Trueswell, J. C. and Thompson-Schill, S. L. (2005) 'Cognitive control and parsing:  
526 Reexamining the role of Broca's area in sentence comprehension', *Cognitive, Affective, & Behavioral*  
527 *Neuroscience*, 5(3), pp. 263-281.
- 528 Osterrieth, P.A. (1944) Le test de copie d'une figure complexe. *Arch. Psychol.* 30, 206–356.
- 529 Papitto, G., Friederici, A. D. and Zaccarella, E. (2020) 'The topographical organization of motor  
530 processing: An ALE meta-analysis on six action domains and the relevance of Broca's region',  
531 *NeuroImage*, 206, pp. 116321.
- 532 Phan, T. G., Donnan, G. A., Wright, P. M. and Reutens, D. C. (2005) 'A Digital Map of Middle Cerebral  
533 Artery Infarcts Associated With Middle Cerebral Artery Trunk and Branch Occlusion', *Stroke*, 36(5),  
534 pp. 986-991.
- 535 Price, C. J., Seghier, M. L. and Leff, A. P. (2010) 'Predicting language outcome and recovery after  
536 stroke: the PLORAS system', *Nature Reviews Neurology*, 6(4), pp. 202-210.
- 537 Ramsey, L. E., Siegel, J. S., Lang, C. E., Strube, M., Shulman, G. L. and Corbetta, M. (2017)  
538 'Behavioural clusters and predictors of performance during recovery from stroke', *Nature Human*  
539 *Behaviour*, 1(3), pp. 0038.
- 540 Richardson, J. D., Fillmore, P., Rorden, C., Lapointe, L. L. and Fridriksson, J. (2012) 'Re-establishing  
541 Broca's initial findings', *Brain and Language*, 123(2), pp. 125-130.
- 542 Robertson, I. H., Manly, T., Andrade, J., Baddeley, B. T. and Yiend, J. (1997) 'Oops!': Performance  
543 correlates of everyday attentional failures in traumatic brain injured and normal subjects',

- 544 *Neuropsychologia*, 35(6), pp. 747-758.
- 545 Sage, K., Snell, C. and Lambon Ralph, M. A. (2011) 'How intensive does anomia therapy for people  
546 with aphasia need to be?', *Neuropsychological Rehabilitation*, 21(1), pp. 26-41.
- 547 Schumacher, R., Halai, A. D. and Lambon Ralph, M. A. (2019) 'Assessing and mapping language,  
548 attention and executive multidimensional deficits in stroke aphasia', *Brain*, 142(10), pp. 3202-3216.
- 549 Seghier, M. L., Ramlackhansingh, A., Crinion, J., Leff, A. P. and Price, C. J. (2008) 'Lesion identification  
550 using unified segmentation-normalisation models and fuzzy clustering', *Neuroimage*, 41(4), pp.  
551 1253-1266.
- 552 Snell, C., Sage, K. and Lambon Ralph, M. A. (2010) 'How many words should we provide in anomia  
553 therapy? A meta-analysis and a case series study', *Aphasiology*, 24(9), pp. 1064-1094.
- 554 Sperber, C. and Karnath, H.-O. (2017) 'Impact of correction factors in human brain lesion-behavior  
555 inference', *Human Brain Mapping*, 38(3), pp. 1692-1701.
- 556 Swinburn K, Porter G, Howard D. (2005) *The Comprehensive Aphasia Test*. Hove, UK: Psychology  
557 Press.
- 558 Tochadse, M., Halai, A. D., Ralph, M. A. L. and Abel, S. (2018) 'Unification of behavioural,  
559 computational and neural accounts of word production errors in post-stroke aphasia', *Neuroimage-  
560 Clinical*, 18, pp. 952-962.
- 561 Tranter, L. J. and Koutstaal, W. (2008) 'Age and Flexible Thinking: An Experimental Demonstration of  
562 the Beneficial Effects of Increased Cognitively Stimulating Activity on Fluid Intelligence in Healthy  
563 Older Adults', *Aging, Neuropsychology, and Cognition*, 15(2), pp. 184-207.
- 564 Tremblay, P. and Dick, A. S. (2016) 'Broca and Wernicke are dead, or moving past the classic model  
565 of language neurobiology', *Brain and Language*, 162, pp. 60-71.
- 566 Tyler, L. K., Marslen-Wilson, W. and Stamatakis, E. A. (2005) 'Dissociating neuro-cognitive component  
567 processes: voxel-based correlational methodology', *Neuropsychologia*, 43(5), pp. 771-778.
- 568 Vallila-Rohter, S. and Kiran, S. (2013) 'Non-linguistic learning and aphasia: Evidence from a paired  
569 associate and feedback-based task', *Neuropsychologia*, 51(1), pp. 79-90.
- 570 Wechsler, D. (2008) *Wechsler Adult Intelligence Scale (4th ed.)*. San Antonio, TX: Pearson  
571 Assessment.
- 572 Wilke, M., de Haan, B., Juenger, H. and Karnath, H. O. (2011) 'Manual, semi-automated, and  
573 automated delineation of chronic brain lesions: A comparison of methods', *Neuroimage*, 56(4), pp.  
574 2038-2046.
- 575 Yeung, O. and Law, S.-P. (2010) 'Executive functions and aphasia treatment outcomes: Data from an  
576 ortho-phonological cueing therapy for anomia in Chinese', *International Journal of Speech-Language  
577 Pathology*, 12(6), pp. 529-544.
- 578 Yourganov, G., Smith, K. G., Fridriksson, J. and Rorden, C. (2015) 'Predicting aphasia type from brain  
579 damage measured with structural MRI', *Cortex*, 73, pp. 203-215.
