## 19 **Abstract**

20 While language impairment is the defining symptom of aphasia, the co-occurrence of non-language  
21 cognitive deficits and their importance in predicting rehabilitation and recovery outcomes is well  
22 documented. Despite this, people with aphasia (PWA) are rarely tested on assessments of higher  
23 order cognitive functions, making it difficult for studies to associate these functions with a consistent  
24 lesion correlate. Contrary to classic models of speech and language, cumulative evidence shows  
25 that Broca's area and surrounding regions in the left inferior frontal cortex (LIFC) are involved in, but  
26 not specific to, speech production – suggesting that these regions may be involved in higher-level  
27 cognitive functions that support language production. A better understanding of language processing  
28 in the context of other domain general cognitive functions is essential for improving aphasia  
29 treatments.

30 This study aimed to explore the brain-behaviour relationships between tests of individual cognitive  
31 skill and language abilities in people with post-stroke aphasia, with a focus on language production  
32 deficits and their associated lesion correlates. We predicted our analysis would reveal a latent (non-  
33 language specific) cognitive component, that would be driven by damage to LIFC.

34 We analysed the behavioural and neural correlates of an extensive battery of language and non-  
35 language cognitive tests in a sample of thirty-six adults with long-term speech production deficits  
36 from post-stroke aphasia. All participants were anomic, with relatively intact speech comprehension  
37 and no apraxia of speech. The behavioural variables were analysed using Principal Component  
38 Analysis and their neural correlates were estimated using Voxel-Based Correlational Morphology.

39 A significant number of anomic adults showed impaired performance on tests of non-language  
40 specific cognitive function. The variance underlying behavioural performance was best captured by  
41 four orthogonal components, two higher-order cognitive components (executive functions and verbal  
42 working memory) and two linguistic processing components (phonology and semantics). Brain-  
43 behaviour relationships revealed separable neural correlates for each component in line with  
44 previous studies and an executive functions correlate in the left inferior frontal cortex (LIFC).

45 Our findings suggest that in adults with chronic post-stroke language production deficits (anomia),  
46 higher-level cognitive functions explain more of the variance in language function than classical

47 models of the condition imply. Additionally, lesions to the LIFC, including Broca's area, were  
48 associated with executive (dys)function, independent of language abilities, suggesting that lesions  
49 to this area are associated with non-language specific higher-level cognitive functions that support  
50 speech production. These findings support contemporary models of speech production that place  
51 language processing within the context of domain-general perception, action and conceptual  
52 knowledge.

53

54

## 55 **1. Introduction**

56 While language impairment is the defining consequence of post-stroke aphasia, the presence of co-  
57 occurring impairments in other cognitive domains has been well documented (Fucetola et al., 2009;  
58 Helm-Estabrooks, 2002; Murray, 2012; El Hachioui et al., 2014; Marinelli et al., 2017; Ramsey et al.,  
59 2017; Schumacher et al., 2019) Despite this, People With Aphasia (PWA) rarely receive extensive  
60 cognitive assessment, meaning data on individual cognitive skills in this patient population is scarce.  
61 Evidence suggests that executive functions may be impaired in post-stroke aphasia, but the  
62 relationship between language and executive functions is difficult to tease apart (see Fedorenko,  
63 2014) and studies have not been able to converge on the underlying lesions correlates of executive  
64 functions in PWA (Mirman and Thye, 2018).

65 Deficits in non-language specific cognitive domains have consistently been shown to be predictive  
66 of certain aspects of language function recovery in post-stroke aphasia. Marinelli and colleagues  
67 (2017) examined language and cognitive function in 189 PWA and found more severe language  
68 deficits to be associated with more severe cognitive impairments. Other studies have investigated  
69 executive functions in PWA and consistently found impaired inhibition, working memory or cognitive  
70 flexibility (Frankel et al., 2007; Fridriksson et al., 2006; Jefferies, Patterson and Ralph, 2008; Lee  
71 and Pyun, 2014; Murray, 2012; Vallila-Rohter and Kiran, 2013). A better understanding of language  
72 processing in the context of other domain-general cognitive functions is important for clinical

73 management and rehabilitation. In fact, a series of aphasia therapy studies emphasise that cognitive  
74 abilities, particularly executive functions and verbal short-term memory, play an important role in  
75 driving recovery outcomes (Fillingham, Sage and Lambon Ralph, 2005a, 2005b, 2006; Conroy, Sage  
76 and Lambon Ralph, 2009; Mirman et al., 2015; Lambon Ralph et al., 2010; Yeung and Law, 2010;  
77 Snell, Sage and Lambon Ralph, 2010, Sage, Snell and Lambon Ralph, 2011; Dignam et al., 2017;  
78 Lacey et al., 2017; Schumacher et al., 2020).

79 While studies have highlighted the impact of cognition on aphasia rehabilitation and recovery, few  
80 have explored the contribution of individual cognitive skills and the relationship to underlying lesion  
81 pattern. The neural basis of aphasia is commonly explored by linking behavioural assessment with  
82 brain lesion data. This has resulted in some distinct brain-behaviour relationships for various  
83 language domains, however studies have not been able to converge on a consistent lesion correlate  
84 of higher-level executive functions (Mirman and Thye, 2018), either because non-language  
85 assessments were not included (Kummerer et al., 2013; Mirman et al., 2015) or were only included  
86 in a limited scope (Butler et al., 2014; Halai et al., 2017; Tochadse et al., 2018; though see Lacey et  
87 al., 2017). More recently, the neural correlates of non-language cognitive domains in aphasia have  
88 been explored by Schumacher et al., (2019, 2020) and Alyahya et al., (2020), whose findings are  
89 discussed in more detail below.

90 When assessing cognitive abilities, it is important to consider that cognition is a multidimensional  
91 construct broadly comprising five general domains, including language, attention, memory, executive  
92 functions and visuo-spatial skills (Helm-Estabrooks, 2002), with each domain containing distinct  
93 components. Using composite or general scores risks reducing the sensitivity of the cognitive  
94 measure. Schumacher and colleagues (2019) recently demonstrated the importance of this by using  
95 a detailed non-verbal neuropsychological assessment to show that brain regions involved in  
96 particular components of the attention and executive functions domains contribute to the abilities of  
97 adults with a wide range of aphasia types. Lacey and colleagues (2017) showed that executive  
98 functioning explains considerable variance in language abilities of PWA. Schumacher et al., (2020)  
99 recently showed that variance in functional communication abilities in PWA can be almost entirely  
100 explained by patients' verbal short-term memory. Another study used extensive assessments of

101 attention to show that different aspects of attention differentially predict language function in aphasia  
102 (Murray, 2012). Finally, studies that have explored the role of cognition in aphasia have typically  
103 involved a sample of diverse aphasia types and severity. While this is pertinent to capturing the  
104 incidence of cognitive impairment in the general aphasic population, the wide variability of aphasia  
105 subtypes can confound analyses of the links between domain-general cognitive impairment and any  
106 particular aphasic subtype or symptom.

107 Executive functions and language are closely linked in both brain and behaviour. Behaviourally,  
108 cognitive control and working memory have long been known to support language processing  
109 (Gordon et al., 2002; Novais-Santos et al., 2007; January et al., 2009; Fedorenko, 2014). Neurally,  
110 both executive functions and language robustly engage regions within the left frontal cortex (Kaan  
111 and Swaab, 2002; Novick et al., 2005). This makes it challenging to functionally dissociate  
112 anatomical correlates of the two domains. Of particular relevance is the function of Broca's area and  
113 the left inferior frontal cortices (LIFC). Damage to Broca's area, which encompasses  
114 cytoarchitecturally defined Brodmann's area BA 44 and BA 45 of the left posterior inferior frontal  
115 gyrus (LpIFG) (Ardila et al., 2016; Papitto et al., 2020) commonly results in anomia, which has led  
116 people to believe that Broca's area within the LpIFG play a causal role in language production.  
117 However, research in more recent years challenges this notion. The current view is that long-term  
118 speech production outcome following left inferior frontal damage is best explained by a combination  
119 of damage to Broca's area and neighbouring regions including the underlying white matter (Gajardo-  
120 Vidal and Lorca-Puls et al., 2021), which was also damaged in Paul Broca's two historic cases  
121 (Dronkers et al., 2007), and that Broca's area is not specialised for speech and language, but rather  
122 is part of a wider network of general cognitive processing that includes, but is not limited to language  
123 (Duncan, 2010; Duncan, 2013). Nevertheless, some argue that executive functions and language  
124 occupy nearby but distinct regions within the left frontal cortex (Fedorenko and Varley, 2016). To  
125 date, the brain areas required for speech production, and the type of aphasia that results from  
126 damage to the LIFC remains a topic of continued debate (Marie, 1906; Mohr et al., 1978; Alexander  
127 et al., 1990; Lorch, 2008; Fridriksson et al., 2015; Tremblay and Dick, 2016).

128 Here, we aimed to tease apart the cognitive processes associated with language production, and  
129 their underlying neural correlates – with a particular interest in how lesion correlates within the LIFG  
130 are associated with long-term language production deficits. We sampled a wide range of PWA from  
131 left hemisphere stroke who had long-term speech production deficits (anomia) and varying damage  
132 to LIFG. Anomia is the most common symptom of post-stroke aphasia and manifests as difficulty in  
133 word retrieval when naming common objects (Laine and Martin, 2013). The participants in this study  
134 had relatively intact comprehension and no speech apraxia. The participants were assessed on an  
135 extensive battery of language and domain-general cognitive functions. The behavioural data were  
136 analysed using Principal Component Analysis (PCA) and their underlying lesion correlates were  
137 mapped using Voxel-Based Correlational Morphology (VBCM). We predicted that our analysis would  
138 reveal a non-language specific higher-level cognitive component to anomic symptoms, which would  
139 be driven by damage to Broca’s area and surrounding regions in the left frontal cortices.

140

## 141 **2. Materials and methods**

142

### 143 **2.1 Participants**

144 Thirty-six English speakers with chronic aphasia following a single left-hemisphere stroke  
145 participated in the study (see Fig. 1 for a lesion overlap map, Table 1 for demographic and clinical  
146 data). All were at least 12 months post-stroke and at the time of scanning and assessment, had  
147 normal hearing, normal or corrected-to-normal visual acuity and no previous history of significant  
148 neurological or psychiatric disease. Inclusion criteria were: (i) anomia as determined by the naming  
149 subtest of the Comprehensive Aphasia Test (Swinburn et al., 2005); (ii) good single word  
150 comprehension as assessed by the spoken word comprehension subtest of the Comprehensive  
151 Aphasia Test (Swinburn et al., 2005); (iii) relatively spared ability to repeat single monosyllabic  
152 words from the Psycholinguistic Assessments of Language Processing in Aphasia (Kay et al.,  
153 1992); (iv) absence of speech apraxia as determined by the Apraxia Battery for Adults (Dabul,  
154 2000). Participants were excluded if they had any contraindications for scanning or any other  
155 significant neurological or psychiatric conditions. Informed consent was obtained from all

156 participants in accordance with the Declaration of Helsinki and the study was approved by the  
157 Central London Research Ethics Committee, UK.

158 **Table 1.** Participant demographic and clinical data

| ID | Gender | Age (years) | Education (years) | Time post-stroke (years) | Total lesion volume (cm <sup>3</sup> ) |
|----|--------|-------------|-------------------|--------------------------|----------------------------------------|
| 01 | M      | 55          | 16                | 11                       | 61.53                                  |
| 02 | M      | 56          | 11                | 7                        | 160.80                                 |
| 03 | M      | 71          | 13                | 2                        | 42.76                                  |
| 04 | M      | 55          | 11                | 9                        | 57.24                                  |
| 05 | M      | 71          | 16                | 2                        | 78.36                                  |
| 06 | F      | 51          | 13                | 13                       | 43.42                                  |
| 07 | M      | 47          | 13                | 12                       | 161.81                                 |
| 08 | F      | 66          | 16                | 18                       | 83.18                                  |
| 09 | M      | 61          | 16                | 4                        | 63.56                                  |
| 10 | M      | 44          | 16                | 3                        | 38.14                                  |
| 11 | F      | 44          | 17                | 1                        | 29.49                                  |
| 12 | F      | 70          | 11                | 12                       | 8.93                                   |
| 13 | M      | 70          | 11                | 29                       | 117.55                                 |
| 14 | M      | 69          | 16                | 7                        | 171.71                                 |
| 15 | M      | 73          | 11                | 11                       | 71.31                                  |
| 16 | F      | 45          | 11                | 3                        | 63.53                                  |
| 17 | F      | 53          | 11                | 5                        | 22.25                                  |
| 18 | F      | 55          | 13                | 5                        | 1.51                                   |
| 19 | M      | 40          | 17                | 8                        | 163.75                                 |
| 20 | M      | 64          | 13                | 24                       | 308.18                                 |
| 21 | M      | 42          | 17                | 1                        | 65.80                                  |
| 22 | M      | 74          | 16                | 11                       | 164.53                                 |
| 23 | M      | 63          | 16                | 25                       | 156.91                                 |
| 24 | M      | 64          | 16                | 10                       | 348.23                                 |
| 25 | M      | 60          | 16                | 11                       | 94.32                                  |
| 26 | F      | 60          | 11                | 6                        | 223.29                                 |
| 27 | M      | 75          | 11                | 12                       | 112.55                                 |
| 28 | F      | 50          | 16                | 3                        | 130.60                                 |
| 29 | M      | 64          | 11                | 8                        | 240.39                                 |
| 30 | M      | 29          | 13                | 6                        | 78.61                                  |
| 31 | F      | 81          | 10                | 16                       | 99.38                                  |
| 32 | M      | 60          | 13                | 20                       | 403.11                                 |
| 33 | M      | 65          | 13                | 14                       | 387.17                                 |
| 34 | M      | 82          | 13                | 34                       | 152.61                                 |
| 35 | M      | 58          | 16                | 8                        | 239.29                                 |
| 36 | M      | 39          | 17                | 2                        | 95.70                                  |

159 Thirty-six participants. 10 Female, age range 29-82 years (mean: 59, SD: 12.5). Average time post-stroke was  
160 10 years and average lesion volume was 131.7cm<sup>3</sup>.

## 161 2.2 Neuropsychology

162 Behavioural assessment

163 A comprehensive battery of language and non-language tests was administered to assess  
164 participants' language and cognitive abilities (see supplementary material for all administered  
165 behavioural tests [Supplementary Table 1] and percentage of participants with impaired performance  
166 scores [supplementary Fig. 1]).

167 The language tests administered to assess speech production included the naming and repetition  
168 subtests of the CAT, the word/non-word repetition subtests from the Psycholinguistic Assessments  
169 of Language Processing in Aphasia subtests 8 and 9 (PALPA; Kay et al., 1992), the Boston Naming  
170 Test (BNT; Kaplan, Goodglass and Weintraub, 1983). The language assessments that captured  
171 other language functions included Pyramids and Palm Trees (PPT; Howard and Patterson, 1992),  
172 other subtests from the CAT, and the reading tasks from the PALPA8.

173 The non-language cognitive assessments included the Cattell Culture Fair IQ Test (Scale 2, Form A;  
174 Cattell and Cattell, 1963), Rey-Osterrieth Complex Figure Test (Osterrieth, 1944), Digit Span tasks  
175 from the Wechsler Adult Intelligence Scale – Fourth Edition (WAIS-IV; Wechsler, 2008), the trail  
176 making and card sorting subtests from the Delis-Kaplan Executive Functions System test (D-KEFS;  
177 Delis, Kaplan and Kramer, 2001), the Hopkins Verbal Learning Test (HVLT; Brandt and Benedict,  
178 2001) and the Children's Sustained Attention to Response Task (cSART; Robertson et al., 1997).

179

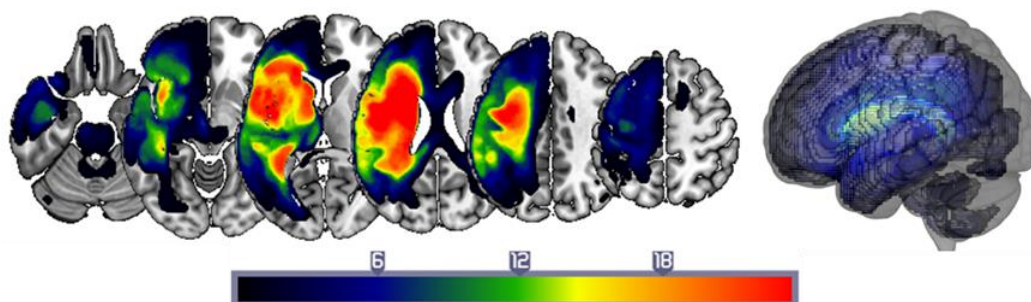

**Figure 1. Lesion overlap map.** A lesion overlap map for the 36 stroke anomic participants. Colour scale represents frequency of regional brain damage (hot-body scale with red indicating most frequently damaged brain regions i.e., >18 patients, while dark blue < 6 patients with damage to these regions). Results are shown overlaid on the MNI template brain, created in MRIcro-GL (Rorden et al., 2007).



## 180 Principal Component Analysis (PCA)

181 PCA is a useful exploratory tool that can extract the underlying latent structure of a set of correlated  
182 variables – like scores in standardised assessments of post-stroke cognitive impairment. There has  
183 been increasing interest in interpreting these latent variables in terms of the potentially separable  
184 cognitive sub-systems underlying (often strongly correlated) task scores. This is typically done by  
185 correlating latent variables with the original scores: those scores that correlate more strongly with  
186 the latent variable are said to load on that latent variable. Here, following recent results, we employ  
187 varimax rotation to encourage greater sparsity, and thus interpretability, in those loadings (Butler et  
188 al., 2014; Halai et al., 2017; Tochadse et al., 2018).

189 Participants' scores on all assessments were entered into a PCA with varimax rotation (conducted  
190 with SPSS 26.0). We had 55 variables and 36 cases. Factors with an eigenvalue  $\geq 1.0$  were extracted  
191 then rotated. After orthogonal rotation, the factor loadings of each test allowed interpretation of what  
192 cognitive-language primary process was represented by that factor (Table 2). Individual participants'  
193 scores on each extracted factor were then used as behavioural covariates in the neuroimaging  
194 analysis.

## 195 **2.3 Neuroimaging**

### 196 MR Imaging acquisition and analysis

197 Whole-brain imaging was performed on a 3T Siemens TIM-Trio system (Siemens, Erlangen,  
198 Germany) at the Wellcome Centre for Human Neuroimaging. Structural (T1-weighted) MRI images  
199 were normalised using Statistical Parametric Mapping software (SPM12) running under Matlab  
200 2015a (MathWorks, Natick, MA). Lesion images were defined by the Automatic Lesion Identification  
201 toolbox (ALI; Seghier et al., 2008), employing a variant of the unified segmentation algorithm  
202 (Ashburner and Friston, 2005), optimised for use in the focally damaged brain.

203

204 Structural MRI scans were pre-processed with Statistical Parametric Mapping software (SPM12:  
205 Wellcome Trust Centre for Neuroimaging, <http://www.fil.ion.ucl.ac.uk/spm/>). The images were  
206 normalised into standard Montreal Neurological Institute (MNI) space using a modified unified

207 segmentation–normalisation procedure optimised for focal lesioned brains (Seghier et al., 2008).  
208 Data from all participants were entered into the segmentation–normalisation. This procedure  
209 combines segmentation, bias correction and spatial normalisation through the inversion of a single  
210 unified model (see Ashburner and Friston, 2005 for more details). In brief, the unified model  
211 combines tissue class (with an additional tissue class for abnormal voxels), intensity bias and non-  
212 linear warping into the same probabilistic models that are assumed to generate subject-specific  
213 images. Images were then smoothed with an 8 mm full-width-half-maximum (FWHM) Gaussian  
214 kernel and used in the lesion analyses described below. The lesion of each participant was  
215 automatically identified using an outlier detection algorithm, compared to healthy controls, based on  
216 fuzzy clustering. Voxel values in these regions range from 0 to 1, with higher values indicating greater  
217 evidence that the voxel is damaged, and evidence is derived by comparing tissue intensity in each  
218 voxel to intensities from a population of neurologically normal controls. The default parameters were  
219 used. The images generated for each participant were individually checked and visually inspected  
220 with respect to the original scan and were used to create the lesion overlap map in Fig. 1. We  
221 selected the Seghier et al. (2008) method as it is objective and efficient for a large sample of lesions  
222 (Wilke, de Haan, Juenger and Karnath, 2011).

223

#### 224 Lesion-Symptom Mapping

225 For lesion-symptom mapping, we used the fuzzy lesion images as described above and correlated  
226 these with PCA factor scores using a voxel-based correlational methodology (VBCM: Tyler, Marslen-  
227 Wilson and Stamatakis, 2005), a variant of voxel-lesion symptom mapping (VLSM: Bates et al.,  
228 2003). We used VBCM because this approach i) has the virtue of preserving the continuous nature  
229 of both behavioural and neural indices i.e., does not require a binary classification of the  
230 intact/lesioned brain to be marked, as in the case of VLSM, and ii) replicates previous methodology  
231 using varimax-rotated PCA in aphasia (e.g. Butler et al., 2014), aiding data comparisons within the  
232 field.

233 The VBCM analysis of PCA factors was conducted in SPM12 running on Matlab 2019b. The analysis  
234 used the four continuous multidimensional predictors of the PCA factor scores, which are necessarily

235 uncorrelated (orthogonal) with one another; these were entered simultaneously as continuous  
236 behavioural covariates. The outcome of the analysis therefore denotes which voxels' variation in  
237 tissue concentration corresponds to the unique variance in a given principal component, while  
238 controlling for variation in the other components in the analysis. In order to ensure that the results  
239 were not merely attributable to lesion size, each participants' lesion volume was calculated from the  
240 lesion identified by the automated lesion identification method (Seghier et al., 2008) and this was  
241 entered as a covariate in the VBCM. All analyses were performed with and without a correction for  
242 lesion volume. All anatomical labels were based on the Harvard–Oxford atlas in MNI space.

### 243 **3. Results**

#### 244 **3.1 Neuropsychological profiles and principal language-cognitive factors**

245 The rotated PCA produced a four-factor solution which accounted for 55% of variance in participants'  
246 performance (F1 = 28.6%; F2 = 10.6%; F3 = 8.3%; F4 = 7.1%). The loadings of each of the different  
247 behavioural assessments on each of the factors are given in Table 2 (for individual participants'  
248 scores on each factor and percentage of participants with impaired language and non-language  
249 scores, see supplementary Table 1 and supplementary Fig. 2 respectively). Tasks that tapped into  
250 input and output phonology (e.g. word and non-word repetition) loaded heavily on Factor 1, as such  
251 we refer to this factor as 'Phonology'. Factor 2 was interpreted as 'Executive Functions', as  
252 assessments that loaded most heavily on it tapped into non-verbal cognitive processes (e.g. problem  
253 solving and concept formation). Assessments that loaded on Factor 3 were those requiring speech  
254 output (e.g., composite picture description) and online maintenance and use of auditory inputs (e.g.  
255 digit span, sentence repetition) along with phonological skills (e.g. reading aloud non-words), hence  
256 we refer to this factor as 'verbal working memory'. Finally, Factor 4 was interpreted as 'Semantics',  
257 the assessments that loaded on this factor were more diverse but primarily required processing of  
258 meaning (e.g. picture naming and comprehension of written sentences).

259 **Table 2. Loadings of behavioural assessments on rotated PCA factors**

|                                         | Factor 1<br>Phonology | Factor 2<br>Executive<br>Functions | Factor 3<br>Verbal Working<br>Memory | Factor 4<br>Semantics |
|-----------------------------------------|-----------------------|------------------------------------|--------------------------------------|-----------------------|
| PALPA9 Repetition - Words (LILF)        | <b>0.898</b>          | 0.089                              | 0.064                                | 0.190                 |
| PALPA9 Repetition - Words (LIHF)        | <b>0.859</b>          | -0.125                             | 0.196                                | 0.204                 |
| PALPA9 Repetition - Words (HILF)        | <b>0.829</b>          | 0.189                              | 0.054                                | 0.055                 |
| PALPA9 Repetition Non-Words             | <b>0.826</b>          | 0.045                              | 0.299                                | 0.135                 |
| PALPA8 Repetition Non-Words             | <b>0.792</b>          | -0.024                             | 0.308                                | 0.106                 |
| PALPA9 Repetition - Words (HIHF)        | <b>0.778</b>          | 0.108                              | 0.020                                | 0.099                 |
| CAT Repetition - Words                  | <b>0.696</b>          | 0.075                              | 0.003                                | 0.404                 |
| CAT Repetition - Non-Words              | <b>0.620</b>          | 0.227                              | 0.180                                | 0.019                 |
| CAT Comprehension - Spoken Words        | <b>0.606</b>          | 0.269                              | -0.096                               | -0.099                |
| CAT Repetition - Complex Words          | <b>0.580</b>          | 0.042                              | 0.252                                | 0.265                 |
| DKEFS Card Sorting: Free Description    | 0.036                 | <b>0.892</b>                       | 0.073                                | 0.212                 |
| DKEFS Card Sorting: Correct Sorts       | 0.119                 | <b>0.888</b>                       | 0.060                                | 0.179                 |
| DKEFS Card Sorting: Recognition         | 0.089                 | <b>0.841</b>                       | 0.207                                | 0.219                 |
| DKEFS Card Sorting: Perceptual Sorts    | 0.073                 | <b>0.836</b>                       | 0.178                                | 0.225                 |
| DKEFS Card Sorting: Verbal Sorts        | 0.177                 | <b>0.599</b>                       | -0.052                               | 0.141                 |
| WAIS Forward Digit Span                 | 0.286                 | 0.014                              | <b>0.870</b>                         | 0.098                 |
| WAIS Backward Digit Span                | 0.013                 | 0.014                              | <b>0.791</b>                         | 0.000                 |
| CAT Repetition - Digit String           | 0.121                 | 0.229                              | <b>0.776</b>                         | 0.173                 |
| CAT Repetition - Sentences              | 0.233                 | -0.004                             | <b>0.650</b>                         | <b>0.526</b>          |
| PALPA8 Reading - Non-Words              | 0.195                 | 0.228                              | <b>0.628</b>                         | 0.382                 |
| CAT Spoken Picture Description          | 0.276                 | 0.241                              | <b>0.537</b>                         | 0.330                 |
| CAT Reading - Non-Words                 | 0.310                 | 0.378                              | <b>0.506</b>                         | 0.324                 |
| Boston Naming Test                      | 0.123                 | 0.440                              | -0.018                               | <b>0.771</b>          |
| CAT Reading - Words                     | 0.298                 | 0.243                              | 0.314                                | <b>0.748</b>          |
| CAT Naming - Objects                    | 0.400                 | 0.055                              | 0.099                                | <b>0.713</b>          |
| CAT Naming - Actions                    | 0.136                 | 0.281                              | 0.170                                | <b>0.646</b>          |
| CAT Reading - Complex Words             | 0.273                 | 0.049                              | <b>0.568</b>                         | <b>0.640</b>          |
| CAT Reading - Function Words            | 0.088                 | 0.265                              | 0.268                                | <b>0.544</b>          |
| CAT Writing to Dictation                | 0.161                 | 0.290                              | 0.399                                | <b>0.529</b>          |
| CAT Comprehension -Written<br>Sentences | 0.138                 | 0.139                              | 0.372                                | <b>0.510</b>          |

260 Factor loadings >0.5 are given in bold. PALPA = Psycholinguistic Assessments of Language Processing in Aphasia; LILF =  
 261 Low Intelligibility Low Frequency, LIHF = Low Intelligibility High Frequency, HIHF = High Intelligibility High Frequency,  
 262 HILF = High Intelligibility Low Frequency. CAT = Comprehensive Aphasia Test. DKEFS = Delis-Kaplan Executive Functions  
 263 System. WAIS = Wechsler Adult Intelligence Scale. Tests with very low loadings do not appear in this table.

## 264 **3.2 The neural basis of performance in chronic stroke aphasia**

### 265 Voxel-based morphometry of principal component analysis factors

266 The VBCM results are shown in Fig. 2 and Table 3. Each map displays where tissue damage  
267 covaries uniquely with a given factor score, where the factors are necessarily uncorrelated with one  
268 another. Results are thresholded at  $p \leq 0.001$  voxel-level and  $p < 0.05$  FWE corrected at cluster-  
269 level.

270 Performance on the phonological factor was uniquely correlated with a cluster of voxels in the left  
271 parietal lobe, with peak voxels in the left superior parietal lobe. The cluster also included voxels in  
272 the left inferior parietal lobule.

273 Performance on the executive functions factor was uniquely related to a cluster of voxels in the left  
274 frontal lobe, with peak voxels in the left inferior frontal gyrus (pars orbitalis and pars triangularis) and  
275 the left dorsolateral prefrontal cortex.

276 Performance on the verbal working memory factor was uniquely related to a large cluster of voxels  
277 in the left hemisphere, with peak voxels in the posterior superior temporal gyrus, the superior  
278 longitudinal fasciculus and posterior thalamic radiation. The cluster also included voxels within left  
279 Wernicke's area, Heschl's gyrus and the hippocampus.

280

281 Performance on the semantic factor was uniquely related to two clusters in the left hemisphere with  
282 peak voxels in the superior/ middle temporal pole and superior/middle temporal gyrus. The clusters  
283 also included voxels across the left insula.

284

285

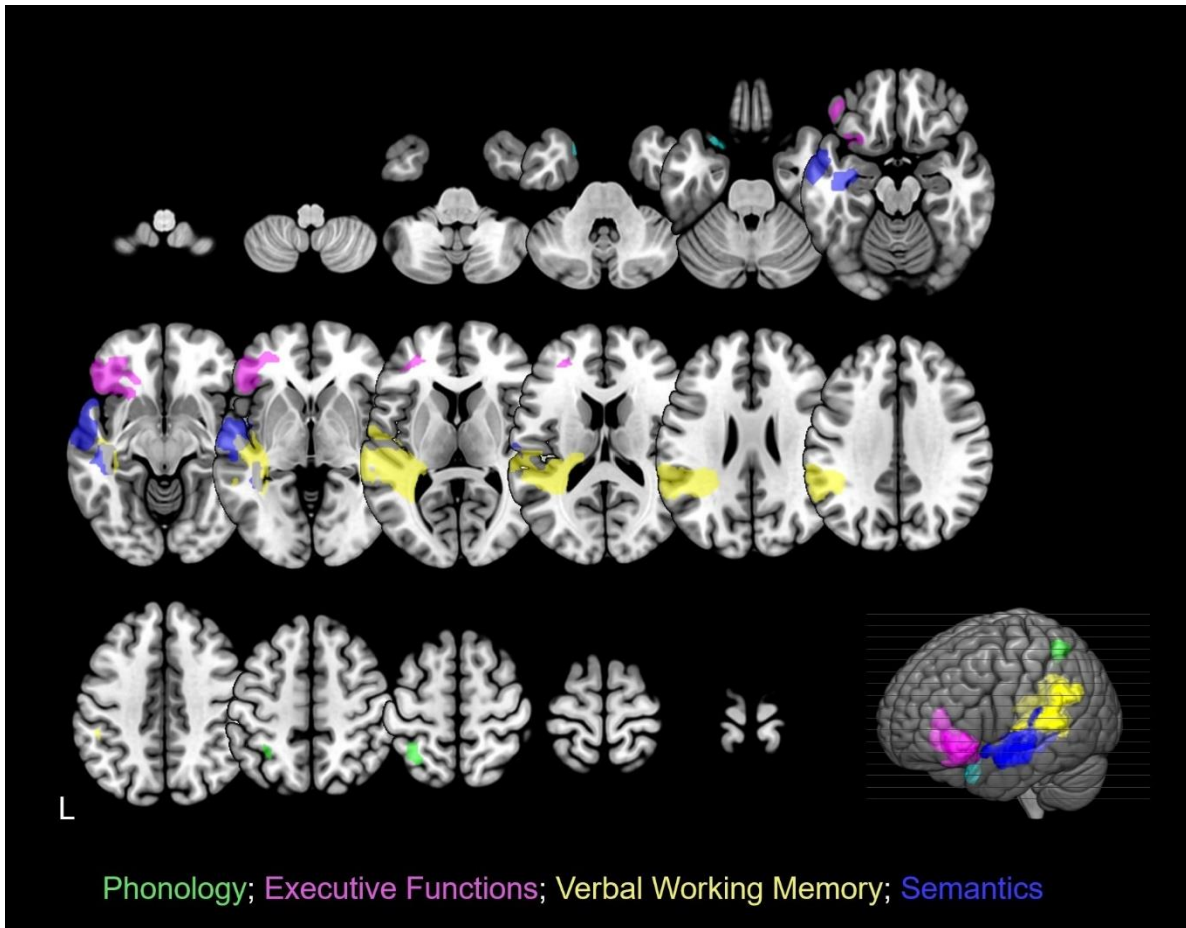

**Figure 2. Structural correlates associated with each component from the combined PCA.** Phonology: green; Executive Functions: magenta; Verbal Working Memory: yellow; Semantics: two distinct clusters in cyan and indigo. Clusters were obtained by applying a voxel-level threshold at  $p \leq 0.001$  and a family-wise error correction of  $p < 0.05$  at cluster level. The lower right corner displays a rendered template brain (created in MRIcro-GL) showing the significant clusters projected to the left brain surface.

286

287

288 **Table 3. Neural correlates for omnibus PCA factors**

| Principal Component        | Location                                                   | Extent (voxels) | Z    | MNI co-ordinates |     |     |
|----------------------------|------------------------------------------------------------|-----------------|------|------------------|-----|-----|
|                            |                                                            |                 |      | x                | y   | z   |
| F1 (Phonology)             | Left Superior Parietal Lobe                                | 175             | 4.16 | -34              | -54 | 58  |
| F2 (Executive Functions)   |                                                            | 1563            |      |                  |     |     |
|                            | Left Inferior Frontal Gyrus (Pars Triangularis)            |                 | 3.93 | -44              | 36  | 2   |
|                            | Left Inferior Frontal Gyrus (Pars Orbitalis)               |                 | 3.59 | -40              | 42  | -8  |
|                            | Left Middle Frontal Gyrus (Dorsolateral Prefrontal Cortex) |                 | 3.56 | -30              | 44  | 4   |
| F3 (Verbal Working Memory) |                                                            | 5262            |      |                  |     |     |
|                            | Left Posterior Superior Temporal Gyrus                     |                 | 4.49 | -58              | -28 | 6   |
|                            | Left Superior Longitudinal Fasciculus                      |                 | 4.94 | -38              | -44 | 18  |
|                            | Left Posterior Thalamic Radiation                          |                 | 5.35 | -36              | -46 | 2   |
| F4 (Semantics)             |                                                            | 209             |      |                  |     |     |
|                            | Left Superior Temporal Pole                                |                 | 4.82 | -22              | 10  | -24 |
|                            | Left Middle Temporal Pole                                  |                 | 4.47 | -20              | 12  | -34 |
|                            |                                                            | 2343            |      |                  |     |     |
|                            | Left Superior Temporal Gyrus                               |                 | 4.14 | -64              | -10 | -4  |
|                            | Left Middle Temporal Gyrus                                 |                 | 4.14 | -62              | -14 | -12 |

289 Only clusters with cluster-level FWEc  $p < 0.05$  are shown in the table.

290 Lesion size and age

291 Given that some brain regions are more likely than others to be damaged after middle cerebral artery  
 292 (MCA) stroke (Phan et al., 2005) and some regions are more susceptible to age-related atrophy, we  
 293 controlled for lesion volume and age in subsequent lesion-symptom analyses.

294 Each participant's lesion volume was calculated from the lesion identified by the modified  
 295 segmentation-normalization procedure (see 'Materials and methods' section). For the PCA factors,  
 296 lesion volume correlated relatively weakly with the phonology factor ( $r=0.137$ ,  $p=0.426$ ), the auditory  
 297 working memory factor ( $r= -0.318$ ,  $p=0.059$ ) and semantic factor ( $r= -0.313$ ,  $p=0.063$ ), and slightly  
 298 more strongly with the executive-functions factor ( $r= -0.426$ ,  $p=0.10$ )

299 Including age in the VBCM model with the PCA factor scores did not alter the pattern of results  
 300 obtained. However, including lesion volume in the model reduced the significance of the executive  
 301 functions measure, which only reached suprathreshold at voxel-level  $p < 0.05$  and FWEc cluster-  
 302 level  $p < 0.05$ , but did not alter the pattern of results in the remaining 3 PCA factors. As previously

303 mentioned, the executive functions component correlated with tissue damage in the left inferior  
304 frontal cortex (LIFC); as a common region of damage following left MCA stroke (Phan et al., 2005),  
305 high covariance between LIFC tissue integrity and total lesion volume is expected.

306

## 307 **4. Discussion**

308 The aim of the current study was to investigate the presence of latent cognitive factors that might  
309 explain the variance in aphasic language production abilities and how this relates to underlying lesion  
310 patterns. We conducted an extensive language and non-language neuropsychological assessment  
311 in a sample of thirty-six PWA with long-term language production deficits. Our results replicate and  
312 extend work on the neural correlates of higher-level cognitive functions in PWA and their role in  
313 language production. We show that (i) the variance underlying language and non-language test  
314 performance was best captured by four orthogonal components, two higher-order cognitive  
315 components (executive functions and verbal working memory) and two linguistic processing  
316 components (phonology and semantics) (Table 2); (ii) brain-behaviour relationships revealed  
317 separable neural correlates for each component in line with previous studies and showed that lesions  
318 to the left inferior frontal cortex (LIFC) are associated with executive dysfunction, independent of  
319 language ability (Fig. 2, Table 3), suggesting that these regions are involved in, but not specific to,  
320 language production.

321 The neural correlates associated with the two language components were in line with previous  
322 literature. The phonological component explained the largest proportion of behavioural variance in  
323 our group of anomic adults. Scores on this component, which in our study loaded principally on tests  
324 of single word and non-word repetition, uniquely correlated with tissue damage in the left superior  
325 and inferior parietal lobule (Fig. 2). This is in line with work showing impaired speech repetition  
326 following left hemisphere stroke is associated with left parietal lobe damage (Fridriksson et al., 2010).  
327 More recent studies that have used a similar approach to ours, with a combined rotated PCA and  
328 VBCM in people with aphasia reported a phonology component uniquely related to left temporo-



329 parietal regions (Butler et al., 2014; Halai et al., 2017; Schumacher et al., 2019; Alyahya et al., 2020).  
330 It is important to note that the phonology component in those studies also loaded on tests of naming  
331 and verbal working memory, as well as repetition, whereas our phonology component was specific  
332 to input/output phonology and loaded heavily on tests of single word and non-word repetition. The  
333 semantic component explained the least amount of behavioural variance in our sample. Scores on  
334 this factor loaded on tests of naming, reading and written comprehension and uniquely correlated  
335 with regions in the left superior/ medial temporal pole and the left superior/ medial temporal gyrus  
336 (Fig. 2). This supports recent findings that extend the temporal regions implicated in semantic  
337 processing (Jackson, 2021).

338 Importantly, higher cognitive functions, namely executive functions and verbal working memory,  
339 independently explain a significant amount of variance in language abilities in our population of  
340 aphasics with chronic language production deficits. Both have also been shown to be robust  
341 behavioural predictors of aphasia recovery outcomes (Fillingham, Sage and Lambon Ralph, 2005a,  
342 2005b, 2006; Conroy, Sage and Lambon Ralph, 2009; Lambon Ralph et al., 2010; Yeung and Law,  
343 2010; Snell, Sage and Lambon Ralph, 2010, Sage, Snell and Lambon Ralph, 2011; Dignam et al.,  
344 2017). During aphasia recovery, executive functions are argued to be important for the generation  
345 of semantic and phonological concepts to aid with word retrieval (Dignam et al, 2017) and to navigate  
346 other complex dynamics of human communication, while the integrity of general memory processes  
347 enables (re)learning and retention of linguistic knowledge during rehabilitation. Schumacher and  
348 colleagues (2020) show that variance in functional communication abilities in PWA, as measured by  
349 the Amsterdam Nijmegen Everyday Language Test, can be almost entirely accounted for by patients'  
350 verbal short-term memory. In our study, the verbal working memory component uniquely correlated  
351 with regions of tissue damage in the left posterior superior temporal gyrus, left superior longitudinal  
352 fasciculus, as well as Heschl's gyrus, Wernicke's area and the hippocampus (Fig. 2). This  
353 component captured abilities both in continuous (narrative) speech production (e.g, spoken picture  
354 description ) and online maintenance of increasing auditory information (e.g. digit-span, sentence  
355 repetition). This replicates findings from Tochadse et al., (2019) who report a similar neural correlate  
356 associated with auditory working memory in PWA.

357 Scores on the executive functions factor uniquely correlated with tissue damage in the left inferior  
358 frontal cortex (LIFC), including pars orbitalis and pars triangularis, and middle frontal gyrus (DLPFC)  
359 (see Fig. 2 for structural correlates and table 3 for MNI co-ordinates). The LIFC results support and  
360 extends recent findings from ECoG and fMRI. Conner et al., (2019) used intracranial recordings to  
361 show that activity in pars triangularis and pars orbitalis is specifically engaged in object naming,  
362 compared to scrambled images, and shows stronger activity for words with high selectivity (number  
363 of possible correct responses). Ekert et al., (2021) used fMRI to show that pars orbitalis was most  
364 activated during object naming, compared to repetition of words and pseudowords. Our participants  
365 all had anomia, and by definition significant object naming deficits. However, our results show that  
366 lesions to pars triangularis and pars orbitalis are associated with executive functions, independent  
367 of language function. This suggests that these regions within the LIFC support high-level planning  
368 and execution that is important for object naming, but not specific to language processing. This  
369 supports contemporary models of speech and language that suggest that language production may  
370 rely on the same process and neural systems that support other high-level action planning and  
371 execution (Botvinivk, 2008; Hickok 2012; Weiss et al., 2016). These findings support the role of  
372 Broca's area, here pars triangularis in particular, and adjacent pars orbitalis in domain-general  
373 cognition and extend our understanding of the neural correlates of anomia. We show that in a group  
374 of PWA with chronic anomia, lesions to the LIFC including Broca's area are associated with  
375 executive (dys)function, independent of language abilities. This suggests that, while damage to the  
376 LIFC commonly coincides with language impairment after stroke, lesions to this area might be driving  
377 a (non-language specific) cognitive component of anomia that co-occurs with language impairment  
378 We speculate that lesions to Broca's area may lead to deficits in high-level executive functioning that  
379 supports language production and that this can contribute to varying levels of long-term language  
380 impairment the nature of which will vary depending on the pattern of damage to neighbouring regions  
381 of grey and white matter (Kimberg et al., 2007; Richardson et al., 2012; Inoue et al., 2014; Mah et  
382 al., 2014; Sperber and Karnath et al., 2017; Gajardo-Vidal and Lorca-Puls et al., 2021).

383 Behaviourally, the executive functions component loaded on tests of problem solving and concept  
384 formation as measured by the D-KEFS Card Sorting assessment. Card sorting assessments,

385 including the D-KEFS and Wisconsin (Berg, 1948) tasks, appear to reliably engage executive  
386 functions and relate to damage in the left inferior frontal cortices (LIFC) and DLPFC in our group of  
387 aphasic adults. The neural correlates associated with our executive functions component show some  
388 overlap, namely pars triangularis and DLPFC, with a PCA component identified by Schumacher and  
389 colleagues (2019), which the authors refer to as 'inhibit-generate'. Their 'inhibit-generate' component  
390 captured abilities of idea generation, reasoning, problem solving and response inhibition in PWA and  
391 loaded on, amongst others, the D-KEFS card sorting test, as we used here. DLPFC is also reported  
392 by Lacey et al., (2017) as a neural correlate of their executive functions component which loaded  
393 on, amongst others, tests of planning, rule following and cognitive flexibility in PWA. Alyahya and  
394 colleagues (2020) also identify the middle frontal gyrus as a structural correlate of executive  
395 functions, specifically tests of abstract reasoning and rule following, in aphasic adults. Baldo et al.  
396 (2005) reported impairment on the Wisconsin Card Sorting Task in aphasic individuals, but not in  
397 adults with left-hemisphere brain damage without aphasia, suggesting that the card sorting task taps  
398 into executive functions that are necessary for effective language function. Consistent with this,  
399 Dignam et al., (2017) show that the D-KEFS Card Sorting assessment is predictive of successful  
400 anomia therapy outcomes. Collectively, these findings suggest that in PWA, card sorting tasks such  
401 as the D-KEFS, that we used here, are a sensitive measure of executive functions supporting  
402 language functioning. Not including these assessments of concept formation and problem solving  
403 skills might be a significant contributing reason to why previous studies in aphasia have previously  
404 struggled to find consistent associations between tests of executive functions and brain damage  
405 (Kummerer et al., 2013; Butler et al., 2014; Mirman et al., 2015; Halai et al., 2017; Tochadse et al.,  
406 2018).

407 In conclusion, our findings suggest that in people with chronic post-stroke anomia, cognitive abilities  
408 and in particular executive functions and verbal working memory, help explain significant variance  
409 in language function, more than classical purely linguistic models of the condition imply. Moreover,  
410 lesions to the LIFC, including Broca's area, determine whether people suffer worse executive  
411 (dys)function, independent of their language abilities. This does not necessarily imply that all  
412 aphasics will have additional cognitive impairments, but that in those who do, higher-level executive

413 functions may explain more of the variance in language production ability than previously thought. A  
414 better understanding of the covariance between language and non-language deficits and their  
415 underlying neural correlates will inform more targeted aphasia treatment, tailored to an individual's  
416 pattern of impairments. This may be in the form of neurostimulation targeting regions of domain-  
417 general cognition or by incorporating measures of higher-order cognitive function, such as concept  
418 formation and verbal working memory, to improve the accuracy of aphasia prediction models (Price  
419 et al., 2010; Hope et al., 2013, 2018; Yourganov et al., 2015).

## 420 **Funding**

421 HA holds a doctoral fellowship funded by Brain Research UK (552175). This study was supported  
422 by Wellcome (106161/Z/14/Z to JC), (203147/Z/16/Z to WCHN). The funders had no participation in  
423 the design and results of this study.

424 The authors report no competing interests.

425

426

427

428

429

## 430 References

- 431 1. Alexander, M. P., Naeser, M. A. and Palumbo, C. (1990) ' Brocas area aphasias - aphasia  
432 after lesions including the frontal operculum', *Neurology*, 40 (2), pp.353-362.
- 433 2. Alyahya, R. S. W., Halai, A. D., Conroy, P., Lambon Ralph, M. A. (2020), 'A unified model of  
434 post-stroke language deficits including discourse production and their neural  
435 correlates', *Brain*, 143(5), pp.1541–1554.
- 436 3. Ardila, A., Bernal, B. and Rosselli, M. (2016) 'How Localized are Language Brain Areas? A  
437 Review of Brodmann Areas Involvement in Oral Language', *Archives of Clinical  
438 Neuropsychology*, 31(1), pp. 112-122.
- 439 4. Ashburner, J. and Friston, K. J. (2005) 'Unified segmentation', *Neuroimage*, 26(3), pp. 839-  
440 851.
- 441 5. Baldo, J., Dronkers, N., Wilkins, D., Ludy, C., Raskin, P. and Kim, J. (2005) 'Is problem  
442 solving dependent on language?', *Brain and Language*, 92(3), pp. 240-250.
- 443 6. Bates, E., Wilson, S. M., Saygin, A. P., Dick, F., Sereno, M. I., Knight, R. T. and Dronkers,  
444 N. F. (2003) 'Voxel-based lesion–symptom mapping', *Nature Neuroscience*, 6(5), pp. 448-  
445 450.
- 446 7. Berg, E. A. (1948) 'A Simple Objective Technique for Measuring Flexibility in Thinking', *The  
447 Journal of General Psychology*, 39(1), pp. 15-22.
- 448 8. Botvinick, M. M. (2008), 'Hierarchical models of behaviour and prefrontal function', *Trends in  
449 Cognitive Sciences*, 12, pp. 201–208.
- 450 9. Brandt J, Benedict R. Verbal Learning Test-Revised Professional Manual. Lutz, FL:  
451 Psychological Assessment Resources, Inc (2001).
- 452 10. Butler, R. A., Lambon Ralph, M. A. and Woollams, A. M. (2014) 'Capturing  
453 multidimensionality in stroke aphasia: mapping principal behavioural components to neural  
454 structures', *Brain*, 137(12), pp. 3248-3266.
- 455 11. Cattell, R. B. and Cattell, A. K. S. (1963). Culture fair intelligence test. Champaign, IL: Institute  
456 for Personality and Ability Testing
- 457 12. Conner, C. R., Kadipasaoglu, C. M., Shouval. H. Z., Hickok, G., Tandon, N. (2019), 'Network  
458 dynamics of Broca's area during word selection'. *PLoS ONE* 14(12): e0225756.
- 459 13. Conroy, P., Sage, K. and Lambon Ralph, M. A. (2009) 'The effects of decreasing and  
460 increasing cue therapy on improving naming speed and accuracy for verbs and nouns in  
461 aphasia', *Aphasiology*, 23(6), pp. 707-730.
- 462 14. Dabul, B. (2000). Apraxia battery for adults (second ed.). Austin, Tx: Pro-Ed.
- 463 15. Delis, D. C., Kaplan, E., and Kramer, J. H. (2001). D-KEFS Executive Function System:  
464 Examiners manual. *San Antonio, TX: Psychological Corporation*.
- 465 16. Dignam, J., Copland, D., O'Brien, K., Burfein, P., Khan, A. and Rodriguez, A. D. (2017)

- 466 'Influence of Cognitive Ability on Therapy Outcomes for Anomia in Adults With Chronic  
467 Poststroke Aphasia', *Journal of Speech, Language, and Hearing Research*, 60(2), pp. 406-  
468 421.
- 469 17. Dronkers, N. F., Plaisant, O., Iba-Zizen, M. T. and Cabanis, E. A. (2007) 'Paul Broca's historic  
470 cases: high resolution MR imaging of the brains of Leborgne and Lelong', *Brain*, 130(5), pp.  
471 1432-1441.
- 472 18. Duncan, J. (2010) 'The multiple-demand (MD) system of the primate brain: mental programs  
473 for intelligent behaviour', *Trends in Cognitive Sciences*, 14(4), pp. 172-179.
- 474 19. Duncan, J. (2013) 'The Structure of Cognition: Attentional Episodes in Mind and Brain',  
475 *Neuron*, 80(1), pp. 35-50.
- 476 20. Ekert, J. O., Lorca-Puls, D. L., Gajardo-Vidal, A., Crinion, J. T., Hope, T. M. H., Green, D. W.,  
477 Price, C. J. (2021), 'A functional dissociation of the left frontal regions that contribute to single  
478 word production tasks', *Neuroimage*, 245, pp. 118734.
- 479 21. El Hachioui, H., Visch-Brink, E. G., Lingsma, H. F., Van De Sandt-Koenderman, M. W. M. E.,  
480 Dippel, D. W. J., Koudstaal, P. J. and Middelkoop, H. A. M. (2014) 'Nonlinguistic Cognitive  
481 Impairment in Poststroke Aphasia', *Neurorehabilitation and Neural Repair*, 28(3), pp. 273-  
482 281.
- 483 22. Fedorenko, E. (2014) 'The role of domain-general cognitive control in language  
484 comprehension', *Frontiers in Psychology*, 5.
- 485 23. Fedorenko, E. and Varley, R. (2016) 'Language and thought are not the same thing: evidence  
486 from neuroimaging and neurological patients', *Annals of the New York Academy of Sciences*,  
487 1369(1), pp. 132-153.
- 488 24. Fillingham, J., Sage, K. and Lambon Ralph, M. (2005a) 'Further explorations and an overview  
489 of errorless and errorful therapy for aphasic word-finding difficulties: The number of naming  
490 attempts during therapy affects outcome', *Aphasiology*, 19(7), pp. 597-614.
- 491 25. Fillingham, J. K., Sage, K. and Lambon Ralph, M. A. (2005b) 'Treatment of anomia using  
492 errorless versus errorful learning: are frontal executive skills and feedback important?',  
493 *International Journal of Language & Communication Disorders*, 40(4), pp. 505-523.
- 494 26. Fillingham, J. K., Sage, K. and Lambon Ralph †, M. A. (2006) 'The treatment of anomia using  
495 errorless learning', *Neuropsychological Rehabilitation*, 16(2), pp. 129-154.
- 496 27. Frankel, T., Penn, C. and Ormond-Brown, D. (2007) 'Executive dysfunction as an explanatory  
497 basis for conversation symptoms of aphasia: A pilot study', *Aphasiology*, 21(6-8), pp. 814-  
498 828.
- 499 28. Fridriksson, J., Fillmore, P., Guo, D. and Rorden, C. (2015) 'Chronic Broca's Aphasia Is  
500 Caused by Damage to Broca's and Wernicke's Areas', *Cerebral Cortex*, 25(12), pp. 4689-  
501 4696.
- 502 29. Fridriksson, J., Kjartansson, O., Morgan, P. S., Hjaltason, H., Magnusdottir, S., Bonilha, L.  
503 and Rorden, C. (2010) 'Impaired Speech Repetition and Left Parietal Lobe Damage', *Journal*

- 504           of *Neuroscience*, 30(33), pp. 11057-11061.
- 505       30. Fridriksson, J., Nettles, C., Davis, M., Morrow, L. and Montgomery, A. (2006) 'Functional  
506           communication and executive function in aphasia', *Clinical Linguistics & Phonetics*, 20(6),  
507           pp. 401-410.
- 508       31. Fucetola, R., Connor, L. T., Strube, M. J. and Corbetta, M. (2009) 'Unravelling nonverbal  
509           cognitive performance in acquired aphasia', *Aphasiology*, 23(12), pp. 1418-1426.
- 510       32. Gajardo-Vidal, A., Lorca-Puls, D. L., Team, P., Warner, H., Pshdary, B., Crinion, J. T., Leff,  
511           A. P., Hope, T. M. H., Geva, S., Seghier, M. L., Green, D. W., Bowman, H. and Price, C. J.  
512           (2021) 'Damage to Broca's area does not contribute to long-term speech production outcome  
513           after stroke', *Brain*.
- 514       33. Goodglass, H., Kaplan, E., and Barresi, B. (2001) The assessment of aphasia and related  
515           disorders (3rd ed.). *Philadelphia: Lippincott, Williams, & Wilkins*.
- 516       34. Gordon, P. C., Hendrick, R. and Levine, W. H. (2002) 'Memory-Load Interference in Syntactic  
517           Processing', *Psychological Science*, 13(5), pp. 425-430.
- 518       35. Halai, A. D., Woollams, A. M. and Lambon Ralph, M. A. (2017) 'Using principal component  
519           analysis to capture individual differences within a unified neuropsychological model of  
520           chronic post-stroke aphasia: Revealing the unique neural correlates of speech fluency,  
521           phonology and semantics', *Cortex*, 86, pp. 275-289.
- 522       36. Helm-Estabrooks, N. (2002) 'Cognition and aphasia: a discussion and a study', *Journal of*  
523           *Communication Disorders*, 35(2), pp. 171-186.
- 524       37. Hickok, G. S. (2012), 'Computational neuroanatomy of speech production', *Nature Reviews*  
525           *Neuroscience*, 13, pp. 135–145.
- 526       38. Hope, T. M. H., Leff, A. P. and Price, C. J. (2018) 'Predicting language outcomes after stroke:  
527           Is structural disconnection a useful predictor?', *NeuroImage: Clinical*, 19, pp. 22-29.
- 528       39. Hope, T. M. H., Seghier, M. L., Leff, A. P. and Price, C. J. (2013) 'Predicting outcome and  
529           recovery after stroke with lesions extracted from MRI images', *NeuroImage: Clinical*, 2, pp.  
530           424-433.
- 531       40. Howard, D., and Patterson, K. (1992) *Pyramids and Palm Trees: A test of semantic access*  
532           *from pictures and words. Bury St. Edmunds, UK: Thames Valley Test Company*.
- 533       41. Inoue, K., Madhyastha, T., Rudrauf, D., Mehta, S. and Grabowski, T. (2014) 'What affects  
534           detectability of lesion–deficit relationships in lesion studies?', *NeuroImage: Clinical*, 6, pp.  
535           388-397.
- 536       42. Jackson, R. L. (2021) 'The neural correlates of semantic control revisited', *NeuroImage*, 224,  
537           pp. 117444.
- 538       43. January, D., Trueswell, J. C. and Thompson-Schill, S. L. (2009) 'Co-localization of Stroop  
539           and Syntactic Ambiguity Resolution in Broca's Area: Implications for the Neural Basis of  
540           Sentence Processing', *Journal of Cognitive Neuroscience*, 21(12), pp. 2434-2444.
- 541       44. Jefferies, E., Patterson, K. and Ralph, M. A. L. (2008) 'Deficits of knowledge versus executive

- 542 control in semantic cognition: Insights from cued naming', *Neuropsychologia*, 46(2), pp. 649-  
543 658.
- 544 45. Kaan, E. and Swaab, T. Y. (2002) 'The brain circuitry of syntactic comprehension', *Trends in*  
545 *Cognitive Sciences*, 6(8), pp. 350-356.
- 546 46. Kaplan, E., Goodglass, H., Weintraub, S (1983) Boston Naming Test. *Philadelphia: Lea &*  
547 *Febiger*.
- 548 47. Kay, J., Lesser, R., & Coltheart, M. (1992) Psycholinguistic Assessments of Language  
549 Processing in Aphasia (PALPA). *Hove: Erlbaum*.
- 550 48. Kimberg, D. Y., Coslett, H. B. and Schwartz, M. F. (2007) 'Power in Voxel-based Lesion-  
551 Symptom Mapping', *Journal of Cognitive Neuroscience*, 19(7), pp. 1067-1080.
- 552 49. Kümmerer, D., Hartwigsen, G., Kellmeyer, P., Glauche, V., Mader, I., Klöppel, S., Suchan,  
553 J., Karnath, H.-O., Weiller, C. and Saur, D. (2013) 'Damage to ventral and dorsal language  
554 pathways in acute aphasia', *Brain*, 136(2), pp. 619-629.
- 555 50. Lacey, E. H., Skipper-Kallal, L. M., Xing, S., Fama, M. E. and Turkeltaub, P. E. (2017)  
556 'Mapping Common Aphasia Assessments to Underlying Cognitive Processes and Their  
557 Neural Substrates', *Neurorehabilitation and Neural Repair*, 31(5), pp. 442-450.
- 558 51. Laine, M. and Martin, N. (2013) Anomia: Theoretical and clinical aspects. *Psychology Press*.
- 559 52. Lambon Ralph, M. A., Snell, C., Fillingham, J. K., Conroy, P. and Sage, K. (2010) 'Predicting  
560 the outcome of anomia therapy for people with aphasia post CVA: Both language and  
561 cognitive status are key predictors', *Neuropsychological Rehabilitation*, 20(2), pp. 289-305.
- 562 53. Lee, B. and Pyun, S.-B. (2014) 'Characteristics of Cognitive Impairment in Patients With Post-  
563 stroke Aphasia', *Annals of Rehabilitation Medicine*, 38(6), pp. 759.
- 564 54. Lorch, M. P. (2008) 'The merest Logomachy: The 1868 Norwich discussion of aphasia by  
565 Hughlings Jackson and Broca', *Brain*, 131, pp. 1658-1670.
- 566 55. Mah, Y.-H., Husain, M., Rees, G. and Nachev, P. (2014) 'Human brain lesion-deficit inference  
567 remapped', *Brain*, 137(9), pp. 2522-2531.
- 568 56. Marie P. (1906) Aphasia from 1861 to 1866. Essay of historical criticism on the genesis of  
569 the doctrine of aphasia. *Sem Méd.* 26:565–571.
- 570 57. Marinelli, C. V., Spaccavento, S., Craca, A., Marangolo, P. and Angelelli, P. (2017) 'Different  
571 Cognitive Profiles of Patients with Severe Aphasia', *Behavioural Neurology*, 2017, pp. 15.
- 572 58. Mirman, D., Chen, Q., Zhang, Y., Wang, Z., Faseyitan, O. K., Coslett, H. B. and Schwartz,  
573 M. F. (2015) 'Neural organization of spoken language revealed by lesion–symptom mapping',  
574 *Nature Communications*, 6(1), pp. 6762.
- 575 59. Mohr, J. P., Pessin, M. S., Finkelstein, S., Funkenstein, H. H., Duncan, G. W. and Davis, K.  
576 R. (1978) 'BROCA APHASIA - PATHOLOGIC AND CLINICAL', *Neurology*, 28(4), pp. 311-  
577 324.
- 578 60. Murray, L. L. (2012) 'Attention and Other Cognitive Deficits in Aphasia: Presence and  
579 Relation to Language and Communication Measures', *American Journal of Speech-*



- 580 *Language Pathology*, 21(2), pp. S51-S64.
- 581 61. Nicholas, L. E., Brookshire, R. H., MacLennan, D. L., Schumacher, J. G. and Porrazzo, S. A.  
582 (1989) 'Revised administration and scoring procedures for the Boston Naming test and norms  
583 for non-brain-damaged adults', *Aphasiology*, 3(6), pp. 569-580.
- 584 62. Novais-Santos, S., Gee, J., Shah, M., Troiani, V., Work, M. and Grossman, M. (2007)  
585 'Resolving sentence ambiguity with planning and working memory resources: Evidence from  
586 fMRI', *NeuroImage*, 37(1), pp. 361-378.
- 587 63. Novick, J. M., Trueswell, J. C. and Thompson-Schill, S. L. (2005) 'Cognitive control and  
588 parsing: Reexamining the role of Broca's area in sentence comprehension', *Cognitive,*  
589 *Affective, & Behavioral Neuroscience*, 5(3), pp. 263-281.
- 590 64. Osterrieth, P.A. (1944) Le test de copie d'une figure complexe. *Arch. Psychol.* 30, 206–356.
- 591 65. Papitto, G., Friederici, A. D. and Zaccarella, E. (2020) 'The topographical organization of  
592 motor processing: An ALE meta-analysis on six action domains and the relevance of Broca's  
593 region', *NeuroImage*, 206, pp. 116321.
- 594 66. Phan, T. G., Donnan, G. A., Wright, P. M. and Reutens, D. C. (2005) 'A Digital Map of Middle  
595 Cerebral Artery Infarcts Associated With Middle Cerebral Artery Trunk and Branch  
596 Occlusion', *Stroke*, 36(5), pp. 986-991.
- 597 67. Price, C. J., Seghier, M. L. and Leff, A. P. (2010) 'Predicting language outcome and recovery  
598 after stroke: the PLORAS system', *Nature Reviews Neurology*, 6(4), pp. 202-210.
- 599 68. Ramsey, L. E., Siegel, J. S., Lang, C. E., Strube, M., Shulman, G. L. and Corbetta, M. (2017)  
600 'Behavioural clusters and predictors of performance during recovery from stroke', *Nature*  
601 *Human Behaviour*, 1(3), pp. 0038.
- 602 69. Richardson, J. D., Fillmore, P., Rorden, C., Lapointe, L. L. and Fridriksson, J. (2012) 'Re-  
603 establishing Broca's initial findings', *Brain and Language*, 123(2), pp. 125-130.
- 604 70. Robertson, I. H., Manly, T., Andrade, J., Baddeley, B. T. and Yiend, J. (1997) 'Oops!':  
605 Performance correlates of everyday attentional failures in traumatic brain injured and normal  
606 subjects', *Neuropsychologia*, 35(6), pp. 747-758.
- 607 71. Sage, K., Snell, C. and Lambon Ralph, M. A. (2011) 'How intensive does anomia therapy for  
608 people with aphasia need to be?', *Neuropsychological Rehabilitation*, 21(1), pp. 26-41.
- 609 72. Schumacher, R., Halai, A. D. and Lambon Ralph, M. A. (2019) 'Assessing and mapping  
610 language, attention and executive multidimensional deficits in stroke aphasia', *Brain*,  
611 142(10), pp. 3202-3216.
- 612 73. Schumacher, R., Bruehl, S., Halai, A. D., & Lambon Ralph, M. A. (2020), 'The verbal, non-  
613 verbal and structural bases of functional communication abilities in aphasia', *Brain*  
614 *communications*, 2(2), fcaa118.
- 615 74. Seghier, M. L., Ramlackhansingh, A., Crinion, J., Leff, A. P. and Price, C. J. (2008) 'Lesion  
616 identification using unified segmentation-normalisation models and fuzzy clustering',  
617 *Neuroimage*, 41(4), pp. 1253-1266.

- 618 75. Snell, C., Sage, K. and Lambon Ralph, M. A. (2010) 'How many words should we provide in  
619 anomia therapy? A meta-analysis and a case series study', *Aphasiology*, 24(9), pp. 1064-  
620 1094.
- 621 76. Sperber, C. and Karnath, H.-O. (2017) 'Impact of correction factors in human brain lesion-  
622 behavior inference', *Human Brain Mapping*, 38(3), pp. 1692-1701.
- 623 77. Swinburn K, Porter G, Howard D. (2005) *The Comprehensive Aphasia Test*. Hove, UK:  
624 *Psychology Press*.
- 625 78. Tochadse, M., Halai, A. D., Ralph, M. A. L. and Abel, S. (2018) 'Unification of behavioural,  
626 computational and neural accounts of word production errors in post-stroke aphasia',  
627 *Neuroimage-Clinical*, 18, pp. 952-962.
- 628 79. Tranter, L. J. and Koutstaal, W. (2008) 'Age and Flexible Thinking: An Experimental  
629 Demonstration of the Beneficial Effects of Increased Cognitively Stimulating Activity on Fluid  
630 Intelligence in Healthy Older Adults', *Aging, Neuropsychology, and Cognition*, 15(2), pp. 184-  
631 207.
- 632 80. Tremblay, P. and Dick, A. S. (2016) 'Broca and Wernicke are dead, or moving past the classic  
633 model of language neurobiology', *Brain and Language*, 162, pp. 60-71.
- 634 81. Tyler, L. K., Marslen-Wilson, W. and Stamatakis, E. A. (2005) 'Dissociating neuro-cognitive  
635 component processes: voxel-based correlational methodology', *Neuropsychologia*, 43(5),  
636 pp. 771-778.
- 637 82. Vallila-Rohter, S. and Kiran, S. (2013) 'Non-linguistic learning and aphasia: Evidence from a  
638 paired associate and feedback-based task', *Neuropsychologia*, 51(1), pp. 79-90.
- 639 83. Wechsler, D. (2008) *Wechsler Adult Intelligence Scale (4th ed.)*. San Antonio, TX: *Pearson*  
640 *Assessment*.
- 641 84. Weiss, P. H., Ubben, S. D., Kaesberg, S., Kalbe, E., Kessler, J., Liebig, T., & Fink, G. R.  
642 (2016), 'Where language meets meaningful action: A combined behavior and lesion analysis  
643 of aphasia and apraxia', *Brain Structure & Function*, 221, pp. 563–576.
- 644 85. Wilke, M., de Haan, B., Juenger, H. and Karnath, H. O. (2011) 'Manual, semi-automated, and  
645 automated delineation of chronic brain lesions: A comparison of methods', *Neuroimage*,  
646 56(4), pp. 2038-2046.
- 647 86. Yeung, O. and Law, S.-P. (2010) 'Executive functions and aphasia treatment outcomes: Data  
648 from an ortho-phonological cueing therapy for anomia in Chinese', *International Journal of*  
649 *Speech-Language Pathology*, 12(6), pp. 529-544.
- 650 87. Yourganov, G., Smith, K. G., Fridriksson, J. and Rorden, C. (2015) 'Predicting aphasia type  
651 from brain damage measured with structural MRI', *Cortex*, 73, pp. 203-215.
